# Supplementary material for: Human induced pluripotent stem cell-derived cardiomyocytes to study inflammation-induced aberrant calcium transient
Source: eLife. 2024 Sep 27;13:RP95867. doi: 10.7554/eLife.95867 (PMC11434618; doi:10.7554/eLife.95867)
Supplement: Figure 1—figure supplement 1—source data 1. [file elife-95867-fig1-figsupp1-data1.xlsx]

## Sheet: Downstroke time
minute	Vehicle
0	0.0040391	0.003938	0.0133163	0.0135987	0.0054513
33.33	0.0178661	0.00953346	0.0483618	0.0737274	0.0203214
66.66	0.0534553	0.019126	0.0832265	0.208603	0.0531298
99.99	0.0667204	0.0206733	0.106623	0.28158	0.070916
133.32	0.0811771	0.0246493	0.128798	0.346135	0.088262
166.65	0.0953943	0.0283508	0.150114	0.406623	0.103911
199.98	0.106562	0.0301004	0.167656	0.462813	0.116426
233.31	0.117444	0.0317388	0.184005	0.514315	0.127182
266.64	0.127861	0.0338677	0.198187	0.560033	0.137456
299.97	0.136631	0.0354354	0.210148	0.600999	0.14642
333.3	0.144564	0.0366112	0.219742	0.636075	0.153221
366.63	0.150663	0.0377748	0.227389	0.66572	0.15847
399.96	0.156571	0.0388402	0.233154	0.69137	0.162418
433.29	0.162138	0.0393711	0.237994	0.711323	0.16404
466.62	0.166402	0.0398421	0.240326	0.727004	0.163598
499.95	0.170257	0.0398774	0.241629	0.737813	0.160627
533.28	0.17269	0.0395254	0.241838	0.744421	0.154675
566.61	0.175215	0.0391243	0.240503	0.747041	0.148543
599.94	0.176038	0.0382463	0.239151	0.746198	0.142667
633.27	0.17721	0.0372495	0.236717	0.742754	0.137423
666.6	0.177034	0.0362274	0.233426	0.735881	0.132638
699.93	0.175909	0.0354863	0.230143	0.727191	0.128034
733.26	0.174505	0.0342453	0.225972	0.716013	0.123508
766.59	0.172051	0.0331073	0.220814	0.700744	0.119134
799.92	0.168742	0.0323155	0.215194	0.680692	0.115029
833.25	0.163748	0.03118	0.207145	0.654383	0.110966
866.58	0.156877	0.0300783	0.198093	0.621222	0.107012
899.91	0.148178	0.0291977	0.188492	0.584675	0.102494
933.24	0.139928	0.028108	0.179061	0.550204	0.0982707
966.57	0.13117	0.0274062	0.170367	0.518315	0.0941753
999.9	0.124036	0.0264201	0.162076	0.489729	0.0902181
1033.23	0.117268	0.0254398	0.155139	0.464219	0.0864799
1066.56	0.110853	0.0247089	0.148174	0.440799	0.0831157
1099.89	0.105203	0.0238249	0.141811	0.418649	0.0797514
1133.22	0.100267	0.023078	0.136008	0.399943	0.0766269
1166.55	0.0950958	0.0221543	0.130493	0.379865	0.0736223
1199.88	0.0908546	0.0215924	0.124977	0.361407	0.0709123
1233.21	0.0865375	0.0210507	0.11988	0.343819	0.0682361
1266.54	0.0821369	0.0203313	0.11552	0.327475	0.0655367
1299.87	0.0787694	0.0196871	0.110648	0.312081	0.0629006
1333.2	0.0751043	0.0189536	0.106462	0.296476	0.0603503
1366.53	0.0717586	0.0182355	0.101967	0.281553	0.0582691
1399.86	0.0685502	0.0175583	0.0976221	0.267897	0.0555357
1433.19	0.0658687	0.0169471	0.0938846	0.254902	0.0532591
1466.52	0.0626154	0.0161636	0.0900673	0.242465	0.0512252
1499.85	0.0599404	0.0152727	0.0864147	0.230792	0.0491743
1533.18	0.0572354	0.0144714	0.0827101	0.219136	0.0474375
1566.51	0.0548023	0.0137655	0.0796051	0.20865	0.0451927
1599.84	0.0527197	0.0129184	0.0760104	0.197989	0.0433278
1633.17	0.0505254	0.0122856	0.0727819	0.188233	0.0413664
1666.5	0.0481053	0.011752	0.0698438	0.17936	0.0398629
1699.83	0.0459922	0.0112833	0.0670037	0.16955	0.037888
1733.16	0.0437978	0.0107052	0.0642975	0.161494	0.0363702
1766.49	0.0420916	0.0103129	0.0614957	0.152785	0.0348555
1799.82	0.0406576	0.00992004	0.0589972	0.144829	0.0334027
1833.15	0.0384975	0.0096292	0.0562826	0.137812	0.0316012
1866.48	0.0371577	0.00921398	0.0541865	0.130298	0.030409
1899.81	0.035342	0.00884315	0.0512807	0.123295	0.0289139
1933.14	0.0340761	0.00860791	0.0492455	0.116649	0.0274482
1966.47	0.0325579	0.00841432	0.0472755	0.110428	0.0259814
1999.8	0.0309413	0.00817989	0.0453419	0.104033	0.0250294
2033.13	0.0297636	0.00793626	0.0428813	0.098567	0.0238665
2066.46	0.0285629	0.00774777	0.0409557	0.092902	0.0227673
2099.79	0.0276679	0.00766095	0.0389197	0.0877031	0.0211616
2133.12	0.0260934	0.00739548	0.0370339	0.0827157	0.0202289
2166.45	0.0250594	0.00721367	0.0351461	0.077662	0.0188765
2199.78	0.0242808	0.00700411	0.0336421	0.0730145	0.0180714
2233.11	0.0230295	0.0067431	0.0318319	0.0685946	0.0170569
2266.44	0.0218449	0.00666609	0.0302524	0.0639849	0.0158889
2299.77	0.0210606	0.00644082	0.0287143	0.0603098	0.0151038
2333.1	0.020209	0.00620385	0.0272537	0.0561362	0.0142094
2366.43	0.0192333	0.00608721	0.0261196	0.0519585	0.0130897
2399.76	0.0183432	0.0058626	0.0245092	0.0489064	0.0123661
2433.09	0.0176895	0.00574965	0.0230104	0.0457067	0.0115877
2466.42	0.0166963	0.00560637	0.0216552	0.0423393	0.0104124
2499.75	0.0158737	0.00548635	0.0202114	0.0394371	0.00987054
2533.08	0.0154703	0.00526355	0.0191177	0.0368506	0.00898745
2566.41	0.0145643	0.00514934	0.0179263	0.0343353	0.00830667
2599.74	0.0138284	0.00507163	0.0169251	0.0323684	0.00770006
2633.07	0.0134237	0.00485224	0.0160052	0.0303264	0.0071705
2666.4	0.0126478	0.00470904	0.0148402	0.029182	0.00630565
2699.73	0.0122627	0.00453714	0.0137875	0.0273831	0.00599717
2733.06	0.0115287	0.0044888	0.0127286	0.026319	0.00551671
2766.39	0.0109393	0.00434707	0.0115409	0.024983	0.00546209
2799.72	0.0104374	0.00421576	0.0108067	0.0241739	0.00493321
2833.05	0.0100098	0.00407274	0.00959074	0.0232101	0.00471645
2866.38	0.00956352	0.00393677	0.00901724	0.0222321	0.00434714
2899.71	0.00902823	0.00384088	0.0081372	0.0209872	0.00419977
2933.04	0.00853415	0.00365755	0.00749807	0.020206	0.00396557
2966.37	0.0080893	0.00353904	0.00676346	0.0190416	0.00370135
2999.7	0.00755336	0.00347297	0.00600576	0.0180428	0.00336315
3033.03	0.0069621	0.00333907	0.00535846	0.0174584	0.00321733
3066.36	0.00672375	0.00326481	0.00450437	0.0162279	0.0030257
3099.69	0.0061875	0.00322324	0.00421996	0.0156098	0.00266873
3133.02	0.00584735	0.00303144	0.00374727	0.0147645	0.00230411
3166.35	0.00594842	0.00287698	0.00308285	0.0139069	0.00218913
3199.68	0.00542826	0.00277097	0.00269385	0.013158	0.00200446
3233.01	0.00498968	0.00268416	0.00228862	0.0126111	0.00170909
3266.34	0.00472604	0.00264574	0.00201518	0.0113916	0.00151325
3299.67	0.00429531	0.00255496	0.00163458	0.0101846	0.00140257
3333	0.00385073	0.00256251	0.00141571	0.00331475	0.00116907
3366.33	0.00357625	0.00240722	0.00141203	0.000438	0.00101835
3399.66	0.00314827	0.00226209	0.00118038	0.000305	0.000898
3432.99	0.00271286	0.00221568	0.000976	0.000131	0.000867
3466.32	0.0024833	0.00209058	0.000845	5.35e-05	0.000671
3499.65	0.00214549	0.00196933	0.000771	0.000285	0.000569
3532.98	0.00171767	0.00197983	0.000772	0.000181	0.000467
3566.31	0.00161308	0.0018304	0.000648	0.00012	0.000398
3599.64	0.00138319	0.00176007	0.000481	0.000259	0.000328
3632.97	0.00120573	0.00173132	0.000503	0.000184	0.00032
3666.3	0.000862	0.00156138	0.000224	0.000191	0.000293
3699.63	0.000839	0.00154058	0.000113	0.000163	0.000207
3732.96	0.00066	0.00147829	2.76e-05	0.00021	0.000183
3766.29	0.000483	0.00136954		0.000144	0.000149
3799.62	0.000501	0.00133633		9.78e-05	0.000115
3832.95	0.000441	0.00121514		0.000299	8.5e-05
3866.28	0.000348	0.00110146		0.000265	3.81e-05
3899.61	0.000255	0.00103204		6.33e-05	5.18e-05
3932.94	0.000143	0.000975		0.000187	3.13e-05
3966.27	6.09e-06	0.000919		0.000157	2.73e-05
3999.6	2.01e-06	0.00079		0.000271	2.36e-05
4032.93		0.000525		9.74e-05	2.2e-05
4066.26		0.000491		0.000127	2.58e-05
4099.59		0.000499		3.63e-05	1.7e-05
4132.92		0.000477		4.36e-05	1.86e-05
4166.25		0.000462		1.59e-05	5.34e-06
4199.58		0.000437		4.99e-05	2.13e-05
4232.91		0.000421		5.36e-06	2.68e-06
4266.24		0.00043		4.59e-06	0
4299.57		0.00043		0
4332.9		0.000422
4366.23		0.000381
4399.56		0.000379
4432.89		0.000373
4466.22		0.000361
4499.55		0.000357
4532.88		0.000369
4566.21		0.000344
4599.54		0.000321
4632.87		0.000309
4666.2		0.000295
4699.53		0.00029
4732.86		0.000271
4766.19		0.000272
4799.52		0.000276
4832.85		0.000267
4866.18		0.000256
4899.51		0.000248
4932.84		0.000239
4966.17		0.000218
4999.5		0.000236
5032.83		0.000222
5066.16		0.000223
5099.49		0.000211
5132.82		0.000176
5166.15		0.00017
5199.48		0.000165
5232.81		0.000166
5266.14		0.000157

## Sheet: dF_dt
minute	Vehicle
0
33.33	0.776801
66.66	1.48639
99.99	0.773834
133.32	0.735051
166.65	0.692232
199.98	0.594987
233.31	0.546764
266.64	0.496315
299.97	0.43338
333.3	0.363482
366.63	0.298823
399.96	0.254015
433.29	0.195072
466.62	0.133843
499.95	0.0781873
533.28	0.0176673
566.61	-0.0163366
599.94	-0.0487524
633.27	-0.065678
666.6	-0.0968885
699.93	-0.11066
733.26	-0.135115
766.59	-0.170351
799.92	-0.203275
833.25	-0.267303
866.58	-0.324835
899.91	-0.361479
933.24	-0.344792
966.57	-0.324825
999.9	-0.293725
1033.23	-0.263603
1066.56	-0.24537
1099.89	-0.230466
1133.22	-0.199904
1166.55	-0.20815
1199.88	-0.188927
1233.21	-0.18132
1266.54	-0.171142
1299.87	-0.16148
1333.2	-0.16044
1366.53	-0.153378
1399.86	-0.147717
1433.19	-0.13381
1466.52	-0.133955
1499.85	-0.125651
1533.18	-0.123627
1566.51	-0.113845
1599.84	-0.114306
1633.17	-0.106638
1666.5	-0.0976108
1699.83	-0.10324
1733.16	-0.0903127
1766.49	-0.0907465
1799.82	-0.0824055
1833.15	-0.0839037
1866.48	-0.0753424
1899.81	-0.0815416
1933.14	-0.0698913
1966.47	-0.0682163
1999.8	-0.066787
2033.13	-0.063067
2066.46	-0.0604737
2099.79	-0.0589346
2133.12	-0.0578759
2166.45	-0.0570584
2199.78	-0.0476679
2233.11	-0.0525418
2266.44	-0.051712
2299.77	-0.0420481
2333.1	-0.0457032
2366.43	-0.0451428
2399.76	-0.0390041
2433.09	-0.037462
2466.42	-0.0422061
2499.75	-0.0349836
2533.08	-0.0311366
2566.41	-0.0324466
2599.74	-0.02633
2633.07	-0.0246931
2666.4	-0.0245601
2699.73	-0.0223026
2733.06	-0.0203152
2766.39	-0.0198566
2799.72	-0.0162319
2833.05	-0.0178027
2866.38	-0.0150186
2899.71	-0.0174208
2933.04	-0.013992
2966.37	-0.0163591
2999.7	-0.0161807
3033.03	-0.0126157
3066.36	-0.0155335
3099.69	-0.0110238
3133.02	-0.0132872
3166.35	-0.0101424
3199.68	-0.0116926
3233.01	-0.0106368
3266.34	-0.0119452
3299.67	-0.013319
3333	-0.0465553
3366.33	-0.0207641
3399.66	-0.0063538
3432.99	-0.0053508
3466.32	-0.004548
3499.65	-0.0024196
3532.98	-0.0037367
3566.31	-0.003047
3599.64	-0.0023872
3632.97	-0.0016047
3666.3	-0.0048729
3699.63	-0.0016191
3732.96	-0.0018224
3766.29	0.0007402
3799.62	-0.0007134
3832.95	-8.066e-05
3866.28	-0.002152
3899.61	-0.0026315
3932.94	-0.000499
3966.27	-0.0016964
3999.6	-0.000168
4032.93	-0.001704
4066.26	-9.013e-06
4099.59	-0.0009158
4132.92	-0.0001254
4166.25	-0.0005623
4199.58	0.00025082
4232.91	-0.0007965
4266.24	6.0523e-05
4299.57	0.0020992
4332.9	0.00622002
4366.23	-0.0012247
4399.56	-7.583e-05
4432.89	-0.0001653
4466.22	-0.0003832
4499.55	-0.0001164
4532.88	0.00037864
4566.21	-0.0007658
4599.54	-0.0006722
4632.87	-0.0003719
4666.2	-0.0004073
4699.53	-0.000177
4732.86	-0.0005472
4766.19	3.1182e-05
4799.52	9.9532e-05
4832.85	-0.0002492
4866.18	-0.0003367
4899.51	-0.0002423
4932.84	-0.0002826
4966.17	-0.0006202
4999.5	0.00054905
5032.83	-0.0004328
5066.16	4.6577e-05
5099.49	-0.0003744
5132.82	-0.0010435
5166.15	-0.0001815
5199.48	-0.0001402
5232.81	1.2415e-05
