# Supplementary material for: Human induced pluripotent stem cell-derived cardiomyocytes to study inflammation-induced aberrant calcium transient
Source: eLife. 2024 Sep 27;13:RP95867. doi: 10.7554/eLife.95867 (PMC11434618; doi:10.7554/eLife.95867)
Supplement: Figure 1—figure supplement 1—source data 2. [file elife-95867-fig1-figsupp1-data2.xlsx]

## Sheet: Supplement Fig1C
	BSA	CCL3	IFNr	IL-1b	IL-6	IP-10	TNF-a
1	0.95532	0.616876	1.00129	0.954452	1.13272	0.761453	1.0522
2	0.942676	1.10201	0.925984	0.79934	1.10384	1.11039	0.92218
3	1.10257	0.942986	0.889267	1.05727	1.1699	0.762848	1.01886
4	0.999431	0.997179	1.05187	1.13279	1.25624	0.949182	1.19076
