# Supplementary material for: Human induced pluripotent stem cell-derived cardiomyocytes to study inflammation-induced aberrant calcium transient
Source: eLife. 2024 Sep 27;13:RP95867. doi: 10.7554/eLife.95867 (PMC11434618; doi:10.7554/eLife.95867)
Supplement: Figure 1—source data 1. [file elife-95867-fig1-data1.xlsx]

## Sheet: Fig1 A
Group	Normalized Downstroke Time
BSA	0.999473
BSA	1.03605
BSA	0.964704
BSA	0.934297
BSA	0.941961
BSA	0.990032
BSA	1.11108
BSA	1.04597
BSA	0.976426
BSA	1.03856
BSA	1.0438
BSA	0.955808
BSA	0.948404
BSA	1.01342
TNFa	1.18722
TNFa	1.34772
TNFa	1.38441
TNFa	1.23738
TNFa	1.35767
IFNr	1.21385
IFNr	1.31387
IFNr	1.24677
IFNr	1.28283
IFNr	1.1689
TNFa + MitoTempo	1.08634
TNFa + MitoTempo	1.11793
TNFa + MitoTempo	0.979644
TNFa + MitoTempo	1.11338
TNFa + MitoTempo	1.2143
IFNr + MitoTempo	1.3774
IFNr + MitoTempo	1.28755
IFNr + MitoTempo	1.11216
IFNr + MitoTempo	1.54583
IFNr + MitoTempo	1.38319

## Sheet: Fig1 B 
Group	Normalized Decay Time
BSA	1.18294
BSA	1.09395
BSA	0.96746
BSA	0.873299
BSA	1.00142
BSA	0.95784
BSA	1.01337
BSA	1.0018
BSA	0.907915
BSA	1.01757
BSA	0.991168
BSA	1.01405
BSA	0.999268
BSA	0.977937
TNFa	1.11241
TNFa	1.12107
TNFa	1.13605
TNFa	1.02696
TNFa	1.11862
IFNr	1.02739
IFNr	1.07508
IFNr	1.13401
IFNr	1.16537
IFNr	1.05402
TNFa + MitoTempo	0.913041
TNFa + MitoTempo	1.02186
TNFa + MitoTempo	0.867865
TNFa + MitoTempo	1.05894
TNFa + MitoTempo	0.969955
IFNr + MitoTempo	1.14186
IFNr + MitoTempo	1.14635
IFNr + MitoTempo	1.02644
IFNr + MitoTempo	1.276
IFNr + MitoTempo	1.18244

## Sheet: Fig1 C
Group	Normalized Beats per Minute
BSA	0.92554
BSA	0.856112
BSA	1.0312
BSA	0.953143
BSA	1.04954
BSA	1.01911
BSA	1.02449
BSA	0.998769
BSA	1.1421
BSA	1.02922
BSA	0.969298
BSA	1.04272
BSA	0.984958
BSA	0.973802
TNFa	0.899258
TNFa	0.895951
TNFa	0.873537
TNFa	1.02964
TNFa	0.947036
IFNr	1.02534
IFNr	1.05569
IFNr	0.970434
IFNr	0.919601
IFNr	0.970882
TNFa + MitoTempo	1.13949
TNFa + MitoTempo	0.864547
TNFa + MitoTempo	1.1869
TNFa + MitoTempo	1.11199
TNFa + MitoTempo	1.21874
IFNr + MitoTempo	1.00176
IFNr + MitoTempo	1.03419
IFNr + MitoTempo	1.13104
IFNr + MitoTempo	0.977978
IFNr + MitoTempo	0.969044
