# Supplementary material for: Human induced pluripotent stem cell-derived cardiomyocytes to study inflammation-induced aberrant calcium transient
Source: eLife. 2024 Sep 27;13:RP95867. doi: 10.7554/eLife.95867 (PMC11434618; doi:10.7554/eLife.95867)
Supplement: Figure 2—source data 1. [file elife-95867-fig2-data1.xlsx]

## Sheet: Sheet1
Time (minutes)	BSA						TNFa						IFNr						TNFa IFNr						TNFa NAC						IFNr NAC						TNFa IFNr NAC
1.30988	116.378	120.062	124.067	100.123	106.386	128.509	113.163	131.638	137.216	132.887	122.692	161.375	141.236	170.274	123.363	126.308	125.873	120.108	122.932	179.4	99.8511	115.68	123.279	109.564	25.5025	112.52	108.365	105.094	104.992	90.8864	126.926	115.126	98.0672	94.0929	99.8157	92.7356	118.608	112.166	127.887	110.852	116.578	106.919
7.78831	109.842	103.674	120.059	85.8419	123.486	120.133	114.87	124.503	122.981	123.956	121.357	161.049	139.859	139.597	125.128	106.651	95.8832	114.726	124.164	156.562	92.9615	112.731	120.681	117.306	20.9466	104.718	111.757	102.454	103.933	85.7894	121.852	114.293	92.9332	93.2913	90.7828	88.6481	103.502	105.278	122.868	109.539	112.999	106.967
14.2732	112.069	108.123	109.749	99.2012	111.5	109.412	116.124	118.395	139.15	105.68	110.305	165.64	134.458	140.577	118.676	103.545	99.6528	114.859	118.45	131.939	98.8846	131.439	122.837	112.82	20.8051	96.5756	113.983	104.303	104.026	85.0584	114.397	117.281	92.3684	94.9333	102.426	89.2021	112.216	108.304	122.568	107.312	113.466	109.419
20.7787	113.629	108.325	119.59	91.9103	107.573	111.322	120.014	125.57	129.029	95.7438	122.869	169.76	135.46	149.188	117.604	106.405	118.165	115.303	116.734	129.599	112.206	138.446	119.075	113.591	21.1477	101.733	112.365	105.898	103.027	90.2691	122.982	121.444	96.9338	100.133	97.7075	89.7523	114.782	111.953	122.168	117.381	117.326	115.338
27.3557	48.6171	53.9774	60.1897	21.497	57.5503	54.4916	43.3159	54.7227	60.3016	55.3099	52.2282	56.6736	59.8407	58.9043	63.5207	52.8462	50.1106	50.4672	43.9076	61.0044	47.659	53.0382	58.9149	53.042	25.554	46.7823	48.7531	39.337	44.0837	36.9627	51.0953	49.9527	48.692	41.7443	40.9117	43.1794	46.6109	54.4418	59.4047	57.1852	55.761	57.642
33.8011	46.5984	53.6702	58.724	20.1869	54.1019	55.6232	40.5284	52.3791	60.822	55.345	51.4064	57.4021	58.792	58.1131	64.0368	51.3414	48.5333	50.5314	41.0122	57.5285	47.5763	52.8533	58.1329	52.9424	23.2211	40.8625	47.1225	37.3304	37.9608	35.7863	50.5254	51.2473	47.753	42.3275	38.5101	39.937	47.4165	52.2753	60.7184	56.5277	56.4281	57.5894
40.2842	45.5159	51.4263	58.1643	18.7353	52.0811	54.8697	38.6371	50.4996	59.6492	54.2126	50.5759	55.6509	56.9852	56.3201	63.2259	49.5584	45.2937	48.869	37.9045	55.1557	46.5232	50.9851	56.6718	50.4995	20.4086	37.6421	46.0955	35.4809	34.5998	33.4385	48.2661	49.7221	45.5878	40.34	37.1388	38.6251	46.0796	50.3125	58.828	54.1204	54.4035	56.0534
46.8336	252.339	311.497	320.621	426.295	369.505	299.354	233.746	351.06	337.475	254.458	332.492	346.71	312.458	370.324	366.008	237.133	195.842	254.171	210.477	307.271	212.834	250.077	304.976	247.936	18.6242	278.847	281.032	321.444	291.109	223.517	262.357	292.28	255.971	258.161	180.789	215.358	311.532	178.794	272.558	285.581	302.549	256.142
53.2933	253.22	323.389	333.38	413.293	359.572	305.589	284.51	335.009	325.796	285.043	352.406	365.376	319.155	341.153	355.236	296.902	260.431	294.495	281.615	333.534	247.555	275.334	325.137	286.564	17.1027	269.206	304.336	309.755	292.317	238.395	237.785	260.382	236.978	267.732	225.593	228.316	320.881	227.545	266.477	274.268	275.678	228.284
59.7442	253.734	330.388	336.823	418.285	360.158	316.006	296.413	338.133	322.457	301.948	351.985	361.214	303.471	331.275	353.323	313.237	287.175	309.599	315.791	343.27	257.685	285.487	331.703	297.64	17.7934	288.302	309.213	308.872	297.773	242.077	272.668	271.752	234.254	271.062	240.804	235.236	316.347	249.102	266.495	277.175	272.67	245.921
66.278	22.3681	24.323	20.1304	-26.8788	23.6019	12.7472	26.7024	31.6525	23.2579	24.3969	26.781	25.0992	28.7999	25.2372	32.8269	20.4016	22.9279	22.9232	28.1515	35.7209	23.4583	24.0238	27.7326	24.2809	14.8675	34.6935	21.8937	24.857	23.5469	19.6294	32.9376	31.5836	24.4094	20.6347	20.4915	19.4266	21.6408	25.5575	31.6736	24.9323	26.285	27.9675
72.7302	25.6134	30.492	27.0314	-17.8739	30.4296	19.7405	28.22	33.8683	29.3305	28.1896	31.5288	31.3649	30.87	30.8512	35.7346	25.7757	28.1573	28.6417	28.8629	34.485	25.1707	26.1808	31.2032	26.6986	13.8014	32.524	25.5393	27.7905	24.8969	22.1811	31.5943	31.2924	27.027	24.6486	24.2782	21.1591	23.1358	26.5908	33.0642	28.7193	29.4601	30.6709
79.198	26.5635	33.9063	28.1274	-15.3779	31.1136	22.9789	28.3475	34.0046	31.1096	29.8682	32.3003	32.0008	31.6315	31.3945	35.5941	26.5587	28.1619	29.8555	28.7046	33.7803	26.2007	26.0839	32.4881	26.9809	14.0991	31.3654	26.6692	27.3865	24.8072	22.1899	30.5998	30.3619	27.3798	25.4643	23.794	21.0059	23.7438	26.3067	33.1738	28.587	30.1475	30.506
85.6829	25.3043	29.2592	26.7299	-17.267	29.9853	22.0744	26.8149	30.569	28.9571	26.6256	30.8158	30.8297	29.1929	29.5675	34.0545	25.9146	26.9087	28.8438	27.0264	31.7674	25.9915	25.212	30.8339	25.641	12.6998	29.4438	26.0035	26.8063	24.178	22.1796	28.2608	28.1795	24.9043	23.5527	23.1581	19.2371	21.4687	24.5299	31.2059	27.0061	27.1802	28.7144
92.1436	23.006	23.5747	24.7896	-20.099	27.8004	21.039	24.725	28.7812	27.682	25.3362	28.1967	28.2957	27.0338	27.6549	32.3612	24.234	25.4642	27.6685	24.8995	28.392	23.9677	23.3791	28.1616	24.4709	12.4346	26.6913	24.2274	24.728	22.2141	20.6093	26.1692	25.6712	23.4849	22.3643	21.1081	18.0013	19.5238	23.6907	28.6697	24.9113	25.2231	27.6926
98.6255	22.438	26.3929	23.462	-22.27	25.7305	18.8932	24.1757	27.9985	25.1589	23.6597	27.6089	27.2788	26.0548	25.4677	31.4918	23.2547	24.0342	26.6962	23.949	27.288	22.3162	20.7479	27.0094	23.1202	11.7044	24.3432	21.7689	22.4751	20.3235	19.6578	24.4454	23.8014	22.4716	20.4131	19.9733	17.6426	17.6092	22.742	27.0868	23.1618	24.0302	26.701
105.122	20.5976	23.2406	22.1705	-24.5285	24.3666	17.7849	22.0249	25.9374	24.0478	22.6255	25.5714	24.4786	24.0165	23.4422	29.6041	20.8893	22.9567	25.0247	22.3208	25.3166	20.5016	19.9339	25.2199	21.7207	10.969	23.4643	19.672	21.3868	18.5735	18.6661	22.4876	21.9889	20.4032	19.5167	19.0345	16.1351	16.4385	21.0504	25.1569	22.3007	22.1591	25.7126
