# Supplementary material for: Human induced pluripotent stem cell-derived cardiomyocytes to study inflammation-induced aberrant calcium transient
Source: eLife. 2024 Sep 27;13:RP95867. doi: 10.7554/eLife.95867 (PMC11434618; doi:10.7554/eLife.95867)
Supplement: Figure 2—source data 2. [file elife-95867-fig2-data2.xlsx]

## Sheet: Figure 2 B-D
	OCR
Group	at Baseline	after adding CCCP	after adding AA/Rot
BSA	115.681	251.644	23.4337
BSA	112.748	320.305	28.1591
BSA	121.068	328.822	23.6817
BSA	114.938	361.626	26.967
BSA	120.046	305.53	17.0742
TNFa	118.745	270.103	26.342
TNFa	127.728	339.948	31.7605
TNFa	134.796	327.123	26.4847
TNFa	117.269	279.03	26.0702
TNFa	122.008	344.175	28.7887
TNFa	167.158	356.314	28.0736
IFNr	140.455	310.242	29.0192
IFNr	152.611	346.131	27.7463
IFNr	123.895	356.736	33.3039
IFNr	113.429	280.971	22.8307
IFNr	112.595	246.363	25.001
IFNr	118.951	284.636	25.7255
TNFa IFNr	123.272	267.841	27.1583
TNFa IFNr	123.272	267.841	27.1583
TNFa IFNr	103.678	237.905	23.5286
TNFa IFNr	127.276	268.846	24.0148
TNFa IFNr	124.17	319.152	29.06
TNFa IFNr	116.022	275.927	24.5721
TNFa NAC	106.589	277.332	31.4463
TNFa NAC	114.32	296.741	23.286
TNFa NAC	107.139	311.904	25.2633
TNFa NAC	106.697	292.28	23.0023
TNFa NAC	90.7028	233.21	19.9188
IFNr NAC	124.241	256.15	30.2959
IFNr NAC	119.738	273.352	29.6646
IFNr NAC	97.7776	240.948	24.8574
IFNr NAC	98.3147	264.199	22.1678
IFNr NAC	100.385	214.276	21.4399
IFNr NAC	92.7865	224.85	19.1159
TNFa IFNr NAC	114.979	314.8	21.4255
TNFa IFNr NAC	112.127	217.027	24.737
TNFa IFNr NAC	126.574	267.057	31.2225
TNFa IFNr NAC	113.973	277.555	25.9982
TNFa IFNr NAC	117.794	282.179	27.2162
TNFa IFNr NAC	112.363	241.996	28.3001
