# Supplementary material for: Human induced pluripotent stem cell-derived cardiomyocytes to study inflammation-induced aberrant calcium transient
Source: eLife. 2024 Sep 27;13:RP95867. doi: 10.7554/eLife.95867 (PMC11434618; doi:10.7554/eLife.95867)
Supplement: Figure 3—figure supplement 1—source data 1. [file elife-95867-fig3-figsupp1-data1.xlsx]

## Sheet: Fig 3 suppl 1a
Antiretroviral [mM]	Darunavir							Tenofovir							Raltegravir							Elvitegravir
3e-06				100							73.7239		104.443	113.924					107.334	92.6661
3e-05	55.2601	121.726	95.624	113.192				95.4433	93.1236	93.3939	93.296		90.1279	95.1031	99.4349	111.008	82.3011	93.6758	70.6979	74.914		106.531	91.662	101.807
0.0001	80.4395	120.688	85.5715	85.9763				98.1683	103.213	69.229	100.688		71.9521	75.6718	111.731	89.3309	97.0615	97.6589	73.0722	72.3621		103.246	96.5305	99.6003
0.0003	71.2135	123.014	90.8765	107.599				95.4433	100.826	87.5385	92.5216		76.5635	77.0294	96.519	105.402	57.1881	89.6372	77.1552	77.0332		117.108	70.7251	99.1206
0.001	94.7591	120.208	76.7107	87.8902				81.0525	99.5196	87.4934	90.2452		68.784	81.6619	96.3156	90.6872	86.1664	96.7048	73.7712	76.1567		99.8641	97.8495	103.725
0.003	55.5869	101.852	93.3944	98.576				92.2453	93.0336	93.4164	92.2283		70.1803	72.3628	92.9928	113.834	54.0235	116.942	68.9116	61.3669		102.982	56.5753	93.9404
0.01	102.582	129.126	72.2322	75.5639				82.9442	89.1825	70.6929	81.6795		123.088	70.6497	90.981	59.4485	90.1447	86.231	83.1022	109.952		88.6642	86.6496	102.646
1e-05	84.3606	125.224	90.4152	100				110.375	96.5018	93.1236	128.251		78.617	93.1318	93.6031	108.612	97.7848	106.646	89.0602	79.5961		89.4076	104.972	100.584

## Sheet: Fig 3 suppl 1b
Antiretroviral log[M]	Darunavir			Elvitegravir			Raltegravir			Tenofovir
-5	25.8012	-3.00793	-2.65182	3.53515	0.801925	1.55707	1.26444	1.89787	2.88807	-11.7677	2.50595	51.4951
-4.52288	22.6746	3.65842	-1.14904	4.89174	45.3422	6.80299	1.70129	44.3816	8.69818	-9.64012	19.8677	16.3033
-4	35.9788	14.1992	31.9121	15.27	4.02967	-4.18337	12.1857	10.7514	-1.12368	26.7981	9.15057	5.8878
-3.52288	42.809	57.4807	-5.23005	-1.4301	2.75996	-1.32986	25.6553	-2.91477	11.9673	18.5816	38.3646	12.1117
-3	-2.21737	6.15118	-3.93381	20.7966	19.587	0.400962	-2.37598	24.17	18.9351	16.3271	56.7346	22.5351
-2.52288	49.7887	19.726	14.1494	6.74953	3.08741	8.74098	-6.62072	4.96311	1.65761	22.7335	33.4903	6.91188
-2	39.547	14.9114	15.8231	6.38198	0.307404	-1.59717	-1.42219	15.5495	-3.67925	2.55359	-2.75734	0.203758
