# Supplementary material for: Human induced pluripotent stem cell-derived cardiomyocytes to study inflammation-induced aberrant calcium transient
Source: eLife. 2024 Sep 27;13:RP95867. doi: 10.7554/eLife.95867 (PMC11434618; doi:10.7554/eLife.95867)
Supplement: Figure 3—source data 1. [file elife-95867-fig3-data1.xlsx]

## Sheet: Fig3A
Group	Normalized Decay Time
BSA	1.18436
BSA	0.779325
BSA	1.16703
BSA	0.86929
BSA	0.968484
BSA	1.04731
BSA	1.02036
BSA	0.963842
BSA	1.1176
BSA	1.09523
BSA	0.787165
BSA	0.93432
BSA	1.03838
BSA	1.01685
BSA	0.973869
BSA	1.03658
BSA	0.847545
BSA	1.14736
BSA	1.0236
BSA	1.0544
BSA	0.927094
TNFa	1.64935
TNFa	1.46044
TNFa	1.46618
TNFa	1.25905
TNFa	1.51619
TNFa	1.17748
TNFa	1.21291
TNFa	1.20752
TNFa	1.2218
TNFa	1.18224
TNFa	1.11184
tenofovir	1.12675
tenofovir	1.16004
tenofovir	1.03124
tenofovir	1.10357
tenofovir	0.890983
tenofovir	1.23328
tenofovir	1.30144
tenofovir	1.11287
tenofovir	1.10879
tenofovir	0.944175
tenofovir + TNFa	0.769196
tenofovir + TNFa	1.04366
tenofovir + TNFa	1.01903
tenofovir + TNFa	1.01689
tenofovir + TNFa	1.07626

## Sheet: Fig3B
Group	Normalized Decay Time
BSA	1.18436
BSA	0.779325
BSA	1.16703
BSA	0.86929
BSA	0.968484
BSA	1.04731
BSA	1.02036
BSA	0.963842
BSA	1.1176
BSA	1.09523
BSA	0.787165
BSA	0.93432
BSA	1.03838
BSA	1.01685
BSA	0.973869
BSA	1.03658
BSA	0.847545
BSA	1.14736
BSA	1.0236
BSA	1.0544
BSA	0.927094
TNFa	1.64935
TNFa	1.46044
TNFa	1.46618
TNFa	1.25905
TNFa	1.51619
TNFa	1.17748
TNFa	1.21291
TNFa	1.20752
TNFa	1.2218
TNFa	1.18224
TNFa	1.11184
darunavir	1.08133
darunavir	1.1402
darunavir	1.09716
darunavir	1.10899
darunavir	0.960861
darunavir	1.20208
darunavir	1.12955
darunavir	1.04507
darunavir	1.15864
darunavir	0.807161
darunavir + TNFa	0.953633
darunavir + TNFa	1.0623
darunavir + TNFa	1.08218
darunavir + TNFa	1.06728
darunavir + TNFa	1.07429

## Sheet: Fig3C
Group	Normalized Decay Time
BSA	1.18436
BSA	0.779325
BSA	1.16703
BSA	0.86929
BSA	0.968484
BSA	1.04731
BSA	1.02036
BSA	0.963842
BSA	1.1176
BSA	1.09523
BSA	0.787165
BSA	0.93432
BSA	1.03838
BSA	1.01685
BSA	0.973869
BSA	1.03658
BSA	0.847545
BSA	1.14736
BSA	1.0236
BSA	1.0544
BSA	0.927094
TNFa	1.64935
TNFa	1.46044
TNFa	1.46618
TNFa	1.25905
TNFa	1.51619
TNFa	1.17748
TNFa	1.21291
TNFa	1.20752
TNFa	1.2218
TNFa	1.18224
TNFa	1.11184
raltegravir	0.979614
raltegravir	1.03409
raltegravir	1.03746
raltegravir	1.00879
raltegravir	0.858897
raltegravir	1.14998
raltegravir	1.08584
raltegravir	1.14433
raltegravir	0.835696
raltegravir	0.814712
raltegravir + TNFa	0.808488
raltegravir + TNFa	0.993725
raltegravir + TNFa	0.991371
raltegravir + TNFa	0.986157
raltegravir + TNFa	0.958875

## Sheet: Fig3D
Group	Normalized Decay Time
BSA	1.18436
BSA	0.779325
BSA	1.16703
BSA	0.86929
BSA	0.968484
BSA	1.04731
BSA	1.02036
BSA	0.963842
BSA	1.1176
BSA	1.09523
BSA	0.787165
BSA	0.93432
BSA	1.03838
BSA	1.01685
BSA	0.973869
BSA	1.03658
BSA	0.847545
BSA	1.14736
BSA	1.0236
BSA	1.0544
BSA	0.927094
TNFa	1.64935
TNFa	1.46044
TNFa	1.46618
TNFa	1.25905
TNFa	1.51619
TNFa	1.17748
TNFa	1.21291
TNFa	1.20752
TNFa	1.2218
TNFa	1.18224
TNFa	1.11184
emtricitabine	1.03986
emtricitabine	1.08321
emtricitabine	1.08077
emtricitabine	1.08256
emtricitabine	0.88919
emtricitabine	1.38975
emtricitabine	1.21744
emtricitabine	1.19747
emtricitabine	1.15774
emtricitabine	0.860283
emtricitabine + TNFa	0.9681
emtricitabine + TNFa	1.02916
emtricitabine + TNFa	1.03675
emtricitabine + TNFa	1.06915
emtricitabine + TNFa	0.994095
