# Supplementary material for: Human induced pluripotent stem cell-derived cardiomyocytes to study inflammation-induced aberrant calcium transient
Source: eLife. 2024 Sep 27;13:RP95867. doi: 10.7554/eLife.95867 (PMC11434618; doi:10.7554/eLife.95867)
Supplement: Figure 4—source data 1. [file elife-95867-fig4-data1.xlsx]

## Sheet: Fig4A
Group	Normalized Decay Time
BSA	1.18436
BSA	0.779325
BSA	1.16703
BSA	0.86929
BSA	0.968484
BSA	1.04731
BSA	1.02036
BSA	0.963842
BSA	1.1176
BSA	1.09523
BSA	0.787165
BSA	0.93432
BSA	1.03838
BSA	1.01685
BSA	0.973869
BSA	1.03658
BSA	0.847545
BSA	1.14736
BSA	1.0236
BSA	1.0544
BSA	0.927094
TNFa	1.64935
TNFa	1.46044
TNFa	1.46618
TNFa	1.25905
TNFa	1.51619
TNFa	1.17748
TNFa	1.21291
TNFa	1.20752
TNFa	1.2218
TNFa	1.18224
TNFa	1.11184
Riociguat	1.4092
Riociguat	1.82415
Riociguat	0.992635
Riociguat	1.74457
Riociguat	1.85364
Riociguat	1.49868
Riociguat	0.723993
Riociguat	0.685939
Riociguat	1.01772
Riociguat	1.28044
Riociguat	1.24163
Riociguat + TNFa	0.682199
Riociguat + TNFa	1.80124
Riociguat + TNFa	1.47395
Riociguat + TNFa	1.57051
Riociguat + TNFa	1.21764
Riociguat + TNFa	1.19755
Riociguat + TNFa	1.44355
Riociguat + TNFa	1.2258

## Sheet: Fig4B
Group	Normalized Decay Time
BSA	1.18436
BSA	0.779325
BSA	1.16703
BSA	0.86929
BSA	0.968484
BSA	1.04731
BSA	1.02036
BSA	0.963842
BSA	1.1176
BSA	1.09523
BSA	0.787165
BSA	0.93432
BSA	1.03838
BSA	1.01685
BSA	0.973869
BSA	1.03658
BSA	0.847545
BSA	1.14736
BSA	1.0236
BSA	1.0544
BSA	0.927094
TNFa	1.64935
TNFa	1.46044
TNFa	1.46618
TNFa	1.25905
TNFa	1.51619
TNFa	1.17748
TNFa	1.21291
TNFa	1.20752
TNFa	1.2218
TNFa	1.18224
TNFa	1.11184
Sildenafil citrate	0.735985
Sildenafil citrate	1.40789
Sildenafil citrate	1.56867
Sildenafil citrate	1.30714
Sildenafil citrate	0.822949
Sildenafil citrate	1.15488
Sildenafil citrate	0.584316
Sildenafil citrate + TNFa	0.743824
Sildenafil citrate + TNFa	1.33217
Sildenafil citrate + TNFa	0.884725
Sildenafil citrate + TNFa	1.57847
Sildenafil citrate + TNFa	1.46879

## Sheet: Fig4C
Group	Normalized Decay Time
BSA	1.18436
BSA	0.779325
BSA	1.16703
BSA	0.86929
BSA	0.968484
BSA	1.04731
BSA	1.02036
BSA	0.963842
BSA	1.1176
BSA	1.09523
BSA	0.787165
BSA	0.93432
BSA	1.03838
BSA	1.01685
BSA	0.973869
BSA	1.03658
BSA	0.847545
BSA	1.14736
BSA	1.0236
BSA	1.0544
BSA	0.927094
TNFa	1.64935
TNFa	1.46044
TNFa	1.46618
TNFa	1.25905
TNFa	1.51619
TNFa	1.17748
TNFa	1.21291
TNFa	1.20752
TNFa	1.2218
TNFa	1.18224
TNFa	1.11184
PF-04447943	1.45592
PF-04447943	1.447
PF-04447943	1.04192
PF-04447943	1.41416
PF-04447943	0.621849
PF-04447943	1.22777
PF-04447943	1.15288
PF-04447943	0.57959
PF-04447943	1.11898
PF-04447943	1.07296
PF-04447943	0.939173
PF-04447943 + TNFa	1.3755
PF-04447943 + TNFa	1.34901
PF-04447943 + TNFa	1.39037
PF-04447943 + TNFa	1.47546
PF-04447943 + TNFa	1.38529
PF-04447943 + TNFa	1.18265
PF-04447943 + TNFa	1.25538

## Sheet: Fig4F
Group	Normalized Decay Time
BSA	1.18436
BSA	0.779325
BSA	1.16703
BSA	0.86929
BSA	0.968484
BSA	1.04731
BSA	1.02036
BSA	0.963842
BSA	1.1176
BSA	1.09523
BSA	0.787165
BSA	0.93432
BSA	1.03838
BSA	1.01685
BSA	0.973869
BSA	1.03658
BSA	0.847545
BSA	1.14736
BSA	1.0236
BSA	1.0544
BSA	0.927094
TNFa	1.64935
TNFa	1.46044
TNFa	1.46618
TNFa	1.25905
TNFa	1.51619
TNFa	1.17748
TNFa	1.21291
TNFa	1.20752
TNFa	1.2218
TNFa	1.18224
TNFa	1.11184
Dapagliflozin (10uM)	0.807314
Dapagliflozin (10uM)	0.725842
Dapagliflozin (10uM)	0.857861
Dapagliflozin (10uM)	0.703902
Dapagliflozin (10uM)	0.744788
Dapagliflozin (10uM)	0.616819
Dapagliflozin (10uM)	0.817169
Dapagliflozin (10uM)	0.760299
Dapagliflozin (10uM)	0.794157
Dapagliflozin (10uM)	0.796072
Dapagliflozin (10uM) + TNFa	0.847998
Dapagliflozin (10uM) + TNFa	0.751849
Dapagliflozin (10uM) + TNFa	0.8858
Dapagliflozin (10uM) + TNFa	0.832485
Dapagliflozin (10uM) + TNFa	0.818646

## Sheet: Fig4G
BSA	TNFa	Dapagliflozin (10uM)	Dapagliflozin (10uM) + TNFa
0.784123	1.45697	0.815409	0.876056
1.14407	1.2591	0.702242	0.729955
0.833123	1.2281	0.874828	0.914698
1.23869	0.893288	0.561907	0.815464
1.09691	1.03441	0.715731	0.832482
1.10472	1.6542	0.585534
1.24747	1.11428	0.85706
0.550909	1.20759	0.710128
1.01648	1.25861	0.910825
1.0461	1.2018	0.746486
0.937419	1.21772
0.948112	1.13741
1.0646
0.9982
0.980983
1.00811
0.541863
1.34183
1.13288
1.05722
0.926207

## Sheet: Fig4J
Group	Normalized Decay Time
BSA	1.18436
BSA	0.779325
BSA	1.16703
BSA	0.86929
BSA	0.968484
BSA	1.04731
BSA	1.02036
BSA	0.963842
BSA	1.1176
BSA	1.09523
BSA	0.787165
BSA	0.93432
BSA	1.03838
BSA	1.01685
BSA	0.973869
BSA	1.03658
BSA	0.847545
BSA	1.14736
BSA	1.0236
BSA	1.0544
BSA	0.927094
IFNr	1.31008
IFNr	1.07963
IFNr	0.789285
IFNr	1.29292
IFNr	1.39808
IFNr	1.0649
IFNr	1.23423
IFNr	1.15987
IFNr	1.28499
Dapagliflozin (10uM)	0.807314
Dapagliflozin (10uM)	0.725842
Dapagliflozin (10uM)	0.857861
Dapagliflozin (10uM)	0.703902
Dapagliflozin (10uM)	0.744788
Dapagliflozin (10uM)	0.616819
Dapagliflozin (10uM)	0.817169
Dapagliflozin (10uM)	0.760299
Dapagliflozin (10uM)	0.794157
Dapagliflozin (10uM)	0.796072
Dapagliflozin(10uM) + IFNr	1.06052
Dapagliflozin(10uM) + IFNr	0.674616
Dapagliflozin(10uM) + IFNr	0.997139
Dapagliflozin(10uM) + IFNr	0.914642
Dapagliflozin(10uM) + IFNr	0.948162

## Sheet: Fig4K
BSA	IFNr	Dapagliflozin (10uM)	Dapagliflozin(10uM) + IFNr
0.784123	2.17961	0.815409	1.21584
1.14407	1.35569	0.702242	0.859983
0.833123	1.71451	0.874828	0.979155
1.23869	1.53198	0.561907	0.962134
1.09691	1.56576	0.715731	0.97011
1.10472	1.44949	0.585534
1.24747	1.23097	0.85706
0.550909	1.23375	0.710128
1.01648	1.45033	0.910825
1.0461		0.746486
0.937419
0.948112
1.0646
0.9982
0.980983
1.00811
0.541863
1.34183
1.13288
1.05722
0.926207
