# Supplementary material for: Human induced pluripotent stem cell-derived cardiomyocytes to study inflammation-induced aberrant calcium transient
Source: eLife. 2024 Sep 27;13:RP95867. doi: 10.7554/eLife.95867 (PMC11434618; doi:10.7554/eLife.95867)
Supplement: Figure 4—source data 2. [file elife-95867-fig4-data2.xlsx]

## Sheet: Figure 4D
msec	Vehicle					TNF-α					Dapagliflozin					Dapagliflozin+ TNF-α
0	0.0120084	0.00841375	0.00660299	0.00753622	0.00564929	0.0121	0.00705855	0.00825752	0.00769494	0.00809782	0.019566	0.0249306	0.0187884	0.00425122	0.00474758	0.0130806	0.01135	0.00598126	0.0167779	0.00652991
33.3333	0.0404827	0.0410217	0.0479027	0.0281831	0.0594985	0.0457383	0.0501538	0.0319154	0.0427736	0.0241563	0.127986	0.158971	0.0954194	0.0485389	0.0297818	0.052137	0.0600248	0.0228175	0.106932	0.0469282
66.6666	0.178515	0.177421	0.184151	0.155713	0.206511	0.239318	0.212797	0.216653	0.235861	0.181358	0.249556	0.270764	0.182842	0.184428	0.12212	0.157831	0.159323	0.181679	0.215295	0.186301
99.9999	0.242601	0.268351	0.281099	0.213223	0.302789	0.380617	0.29354	0.318428	0.320679	0.260007	0.319	0.337808	0.237502	0.260175	0.182673	0.230332	0.212335	0.265596	0.28396	0.257027
133.333	0.291064	0.3267	0.342318	0.256138	0.369104	0.466804	0.350193	0.385216	0.386685	0.317076	0.379189	0.398667	0.283506	0.321222	0.223782	0.277795	0.254358	0.32821	0.339355	0.31505
166.667	0.334851	0.378894	0.396798	0.294204	0.431279	0.544351	0.401986	0.447538	0.447032	0.369657	0.434276	0.452372	0.324459	0.375743	0.261918	0.319166	0.292773	0.382514	0.38809	0.365713
200	0.37279	0.425613	0.444864	0.32788	0.485705	0.615988	0.446999	0.503825	0.501257	0.417434	0.477961	0.494544	0.358147	0.42207	0.292673	0.354609	0.321809	0.429671	0.427778	0.407844
233.333	0.406082	0.467543	0.487058	0.356905	0.534768	0.680061	0.489538	0.554783	0.550651	0.460234	0.517091	0.530315	0.385173	0.461185	0.32061	0.382672	0.346419	0.468834	0.462529	0.443415
266.666	0.434901	0.504289	0.525756	0.383433	0.578542	0.739298	0.528002	0.603651	0.595406	0.498283	0.547739	0.558922	0.408662	0.495166	0.344059	0.408619	0.367094	0.50216	0.492472	0.473437
300	0.459896	0.536405	0.558003	0.405366	0.617487	0.791943	0.5613	0.646407	0.633404	0.532189	0.574186	0.582018	0.427197	0.522341	0.363316	0.429421	0.38273	0.530245	0.515989	0.494928
333.333	0.481115	0.563913	0.585795	0.423596	0.649778	0.838912	0.589846	0.683093	0.666573	0.560262	0.593897	0.597794	0.440506	0.543916	0.379097	0.44745	0.395467	0.550998	0.535217	0.512739
366.666	0.49852	0.587264	0.608303	0.438282	0.679088	0.88015	0.613786	0.716856	0.694047	0.584919	0.608282	0.608485	0.450783	0.559971	0.391577	0.460021	0.4044	0.568674	0.549788	0.524413
400	0.512657	0.606923	0.628788	0.451064	0.702854	0.916806	0.634978	0.746019	0.717858	0.605185	0.617904	0.613592	0.456709	0.571541	0.401144	0.468569	0.410005	0.578967	0.559732	0.533756
433.333	0.524121	0.622384	0.644308	0.46044	0.722753	0.948586	0.652046	0.771592	0.737212	0.621557	0.622511	0.615677	0.460452	0.578191	0.408135	0.475509	0.412906	0.586589	0.566964	0.538706
466.666	0.53247	0.634879	0.657109	0.467963	0.738369	0.977042	0.666007	0.791176	0.752409	0.63546	0.625755	0.611974	0.460572	0.581052	0.41216	0.477756	0.412664	0.589945	0.569927	0.540112
500	0.539218	0.644401	0.666411	0.4725	0.75126	1.00023	0.677131	0.809228	0.763079	0.645271	0.622192	0.606596	0.459333	0.579745	0.412233	0.479473	0.411051	0.58924	0.569859	0.53803
533.333	0.543469	0.650629	0.67182	0.475574	0.760735	1.01944	0.685693	0.822689	0.771479	0.653174	0.617993	0.598664	0.456547	0.57567	0.411982	0.476979	0.406952	0.586237	0.567511	0.534516
566.666	0.54512	0.65447	0.676535	0.477486	0.766543	1.03539	0.691332	0.832655	0.776558	0.65862	0.61166	0.591005	0.452335	0.568082	0.409247	0.474514	0.402427	0.581053	0.56207	0.529683
599.999	0.545506	0.656864	0.67834	0.476336	0.770144	1.04793	0.695389	0.839122	0.778733	0.660656	0.604323	0.579123	0.447143	0.558273	0.405348	0.469301	0.395897	0.574227	0.556397	0.522811
633.333	0.544498	0.655998	0.6778	0.475195	0.771959	1.05685	0.696009	0.845104	0.778762	0.660507	0.594715	0.567796	0.441673	0.542406	0.398506	0.463961	0.38792	0.56729	0.549644	0.515653
666.666	0.540654	0.653874	0.67619	0.471397	0.770428	1.06219	0.695487	0.846165	0.776075	0.659019	0.584888	0.55019	0.435149	0.517849	0.390799	0.457026	0.378281	0.558815	0.541719	0.507914
699.999	0.536396	0.650623	0.671401	0.465727	0.768057	1.06531	0.69307	0.846253	0.772931	0.654826	0.574347	0.516607	0.427929	0.479207	0.382483	0.449476	0.36507	0.55103	0.532285	0.499066
733.333	0.530451	0.645821	0.666894	0.457061	0.763286	1.06626	0.688948	0.845207	0.767165	0.650621	0.560252	0.469056	0.420182	0.43629	0.369481	0.442672	0.347706	0.541497	0.523209	0.487975
766.666	0.524099	0.639526	0.661263	0.448257	0.757064	1.06435	0.684711	0.840226	0.760687	0.644276	0.537148	0.418071	0.408198	0.397874	0.349464	0.433821	0.321249	0.53149	0.509761	0.470665
799.999	0.51673	0.633114	0.655141	0.439721	0.750196	1.06083	0.67839	0.836826	0.754431	0.638234	0.498406	0.375823	0.388159	0.364268	0.320996	0.424188	0.290207	0.520262	0.484662	0.439794
833.332	0.508092	0.626108	0.647672	0.431459	0.741908	1.05529	0.672079	0.829685	0.745903	0.630471	0.449705	0.340424	0.358739	0.334567	0.290724	0.40968	0.26195	0.498735	0.445691	0.397367
866.666	0.493779	0.618654	0.641017	0.422902	0.733589	1.04841	0.664913	0.823381	0.737504	0.623445	0.404447	0.308774	0.325931	0.308344	0.264321	0.381631	0.236631	0.457043	0.404072	0.357106
899.999	0.475519	0.610808	0.632498	0.414802	0.724139	1.04083	0.656838	0.816904	0.729883	0.615445	0.364928	0.281961	0.296076	0.284491	0.24109	0.344462	0.215985	0.411522	0.36548	0.322352
933.332	0.457731	0.601026	0.622999	0.405702	0.71387	1.03174	0.64911	0.809688	0.721224	0.606983	0.331889	0.256926	0.270274	0.261967	0.221393	0.307836	0.197568	0.371627	0.332605	0.292456
966.666	0.438034	0.591247	0.610813	0.393338	0.702307	1.02241	0.641719	0.802	0.711248	0.597605	0.303815	0.234342	0.247775	0.241461	0.203839	0.278157	0.180803	0.338323	0.305458	0.2665
999.999	0.411084	0.576442	0.59088	0.375188	0.684432	1.01228	0.633887	0.794955	0.701579	0.586542	0.277204	0.213555	0.227462	0.221814	0.187815	0.252684	0.166135	0.30846	0.280437	0.244625
1033.33	0.376581	0.553449	0.55593	0.345987	0.656001	1.00098	0.62442	0.785639	0.689946	0.573365	0.25488	0.194135	0.209745	0.204355	0.173733	0.230084	0.151108	0.282526	0.257536	0.223258
1066.67	0.342593	0.516743	0.507814	0.314776	0.612405	0.990287	0.615559	0.77746	0.678432	0.551787	0.232859	0.177084	0.19368	0.187286	0.160545	0.20951	0.137145	0.258989	0.23639	0.204877
1100	0.312588	0.472868	0.461854	0.286196	0.561024	0.978812	0.603123	0.768249	0.657935	0.517796	0.213752	0.160579	0.178837	0.172572	0.148426	0.191209	0.125208	0.237598	0.217859	0.186998
1133.33	0.285949	0.430289	0.422887	0.261583	0.514013	0.966273	0.587102	0.754897	0.622528	0.476182	0.195563	0.14608	0.16542	0.159037	0.137608	0.174806	0.113783	0.218081	0.199948	0.170818
1166.67	0.262668	0.393362	0.388399	0.240044	0.472762	0.950833	0.555906	0.732115	0.574545	0.437765	0.177882	0.132288	0.152865	0.146353	0.127439	0.159161	0.103788	0.198949	0.182596	0.156989
1200	0.242021	0.360836	0.358633	0.222064	0.436345	0.924386	0.512543	0.691373	0.527106	0.402958	0.162908	0.119559	0.141037	0.135033	0.117436	0.144587	0.093681	0.182467	0.168138	0.143359
1233.33	0.222239	0.331937	0.331384	0.204407	0.40471	0.872492	0.469818	0.640797	0.483508	0.372115	0.149005	0.108329	0.129777	0.124368	0.109489	0.132546	0.0847323	0.167148	0.154163	0.131152
1266.67	0.20459	0.306215	0.306657	0.189406	0.3764	0.804203	0.431694	0.592279	0.44721	0.345249	0.136768	0.0983755	0.119943	0.114224	0.100778	0.120325	0.0771746	0.15343	0.141686	0.120833
1300	0.188656	0.282523	0.283644	0.175541	0.350326	0.740433	0.398494	0.549367	0.414525	0.321882	0.125083	0.0887214	0.110947	0.105068	0.0933214	0.109707	0.069365	0.140918	0.130795	0.110098
1333.33	0.173679	0.261222	0.262915	0.163504	0.325695	0.68388	0.36944	0.51081	0.385637	0.299118	0.114255	0.0796392	0.102246	0.0968947	0.0861617	0.100925	0.0623713	0.129408	0.119581	0.100876
1366.67	0.159279	0.24206	0.243587	0.151216	0.302978	0.634527	0.343527	0.477407	0.358993	0.279243	0.105306	0.0718175	0.0941914	0.088554	0.0795322	0.0923226	0.0557069	0.118732	0.109694	0.0913351
1400	0.146435	0.223657	0.225562	0.140738	0.282283	0.59072	0.319812	0.445891	0.334158	0.260834	0.095833	0.0641115	0.0865693	0.0816268	0.0736064	0.0844205	0.0500049	0.108897	0.101465	0.0841818
1433.33	0.134881	0.207438	0.209419	0.130638	0.26291	0.549906	0.298906	0.415569	0.312065	0.243782	0.087222	0.0574123	0.0802346	0.0745801	0.0677128	0.0769981	0.0438537	0.0996094	0.0933072	0.0771451
1466.67	0.123713	0.19199	0.194108	0.121367	0.244555	0.513996	0.278886	0.389338	0.291136	0.227308	0.0797922	0.050029	0.0741225	0.0681912	0.0622812	0.070766	0.038799	0.0915552	0.0855086	0.070062
1500	0.11392	0.177744	0.180099	0.112112	0.227757	0.480577	0.261071	0.364309	0.271921	0.212849	0.0729541	0.0440676	0.0682425	0.062045	0.0573801	0.0652287	0.0340289	0.0835514	0.07847	0.0636072
1533.33	0.104838	0.164669	0.166366	0.104544	0.211813	0.449406	0.243807	0.340453	0.253476	0.198725	0.0666203	0.038731	0.0631272	0.0562292	0.0527388	0.0595409	0.0296452	0.0763363	0.0713943	0.0581972
1566.67	0.0962423	0.15267	0.154704	0.0967308	0.19774	0.420169	0.227988	0.318888	0.236652	0.185876	0.0605738	0.0342573	0.0578851	0.0509719	0.0480642	0.0540645	0.0254309	0.0701742	0.0651769	0.0530901
1600	0.0884453	0.141439	0.14278	0.0896341	0.183659	0.393228	0.212797	0.297869	0.220599	0.173939	0.0549835	0.0295369	0.0534472	0.0456599	0.0442961	0.049409	0.0215833	0.0647992	0.0594795	0.0478787
1633.33	0.0810655	0.131449	0.1329	0.0827075	0.170576	0.367554	0.199061	0.279481	0.206855	0.16238	0.0498584	0.0244461	0.0492569	0.0402787	0.0401189	0.0454882	0.0182067	0.0585938	0.0552175	0.0437316
1666.66	0.0740801	0.121649	0.122648	0.0773382	0.158593	0.343678	0.185877	0.260928	0.192769	0.152193	0.0449056	0.0210181	0.0446584	0.0294461	0.0366938	0.0412051	0.0142523	0.0534494	0.0498981	0.0393675
1700	0.067978	0.112911	0.113417	0.071696	0.147507	0.321203	0.173604	0.243536	0.180359	0.142149	0.0402668	0.0167172	0.0407126	0.0198167	0.0332516	0.0375545	0.00992416	0.0491051	0.0455218	0.0350522
1733.33	0.0627235	0.104399	0.105187	0.0657518	0.13692	0.300825	0.162164	0.227826	0.167592	0.132807	0.0357807	0.0134948	0.0373756	0.0150361	0.0299547	0.0339466	0.00282884	0.04418	0.0415005	0.0316398
1766.66	0.0571776	0.0967256	0.0967486	0.060803	0.126766	0.28145	0.151369	0.213353	0.157036	0.124341	0.0323432	0.0101744	0.0340831	0.0126012	0.0270026	0.0313351	0.00156349	0.0407838	0.0373458	0.0280369
1800	0.0524813	0.0889281	0.0895247	0.0562267	0.117876	0.263011	0.141172	0.198889	0.146988	0.116178	0.0284143	0.00737655	0.0305601	0.0108401	0.0244666	0.0286615	0.00123976	0.0361527	0.0344542	0.0252216
1833.33	0.0479868	0.0821879	0.082484	0.0521911	0.109233	0.246265	0.131703	0.185524	0.13744	0.108433	0.0252056	0.00447057	0.0282216	0.00908688	0.0216405	0.0254371	0.00106504	0.0329988	0.0307784	0.0223961
1866.66	0.0440871	0.0759085	0.0759386	0.0477742	0.101477	0.230074	0.122675	0.173418	0.128534	0.100761	0.0223739	0.00110344	0.0254279	0.00763055	0.0192771	0.0230515	0.000824	0.0299421	0.0276326	0.0199331
1900	0.0404006	0.0698344	0.0700281	0.0441145	0.0936421	0.214717	0.114834	0.161905	0.119388	0.0941915	0.0199458	0.000126	0.0226864	0.00665307	0.0171824	0.0206744	0.000779	0.0267267	0.0247312	0.0172305
1933.33	0.0365044	0.0643314	0.0642579	0.0407358	0.0866377	0.200306	0.107045	0.15182	0.112165	0.0880724	0.0168289	1.59e-05	0.0208283	0.00538334	0.0149971	0.0187691	0.000718	0.0241825	0.0217027	0.0152723
1966.66	0.0335692	0.0594036	0.0591138	0.0373419	0.0796563	0.187778	0.0995853	0.141557	0.104365	0.0819568	0.0149862		0.01774	0.00428653	0.0125257	0.0169314	0.000563	0.0217516	0.0195786	0.0132825
2000	0.0305302	0.054803	0.0539065	0.0346011	0.0734307	0.174717	0.0923121	0.131443	0.0971232	0.0766629	0.0124595		0.0159228	0.00324506	0.00999258	0.0154122	0.000508	0.0187128	0.0168523	0.011163
2033.33	0.0271338	0.0502128	0.0495288	0.0315334	0.0676088	0.163244	0.087331	0.122952	0.0910848	0.0715784	0.0104796		0.0138222	0.0025925	0.00408434	0.0140286	0.000406	0.0162393	0.014815	0.00914851
2066.66	0.0246044	0.0460875	0.0454818	0.0288324	0.0623904	0.15239	0.0803631	0.114178	0.0855839	0.0667373	0.00893775		0.0120777	0.00185438	0.000305	0.0120231	0.000295	0.0144709	0.0128333	0.00792696
2100	0.0225672	0.0418478	0.0413291	0.0261473	0.0566139	0.142354	0.0741585	0.10633	0.0789661	0.0619689	0.00666207		0.0102152	0.00116216	0.000216	0.0107549	0.000281	0.0120789	0.00814474	0.00624383
2133.33	0.0203827	0.0383714	0.0373424	0.0242839	0.0519821	0.132837	0.0691816	0.0986363	0.0741601	0.0574181	0.00503798		0.00820157	0.000566	0.000181	0.00973305	0.000192	0.0102365	0.00603073	0.00440574
2166.66	0.0178546	0.0348043	0.0339879	0.0221427	0.0475793	0.123479	0.0639604	0.0910924	0.0687355	0.0538127	0.00368591		0.00664984	3.55e-05	0.000134	0.00869731	0.000176	0.00783823	0.00524246	0.00266932
2200	0.0162898	0.0320377	0.0308787	0.0202235	0.0435822	0.115332	0.0594831	0.0845079	0.0647672	0.0499689	0.00256489		0.00504707		0.000148	0.00724255	0.000143	0.00560338	0.00417382	0.000153
2233.33	0.0144227	0.0290402	0.0275568	0.0179763	0.0395585	0.107226	0.0546528	0.0785576	0.061076	0.0463347	0.00125332		0.00297744		9.58e-05	0.0068248	8.62e-05	0.000287	0.00308148	1.29e-05
2266.66	0.0127662	0.0266485	0.0246864	0.0163477	0.0355731	0.0997941	0.0504483	0.072451	0.055885	0.0427708	0.000476		0.000671		8.77e-05	0.00544396	5.72e-05	8.6e-05	0.00195856
2300	0.0107408	0.0242923	0.0219079	0.0145883	0.03179	0.0928504	0.0464614	0.0670422	0.0523476	0.0394791	0.000111		5.2e-05		4.72e-05	0.00447265	1.72e-06	5.81e-05	0.000613
2333.33	0.00958794	0.0219758	0.0196319	0.0128371	0.0287073	0.0862064	0.042771	0.0607413	0.0485114	0.0370767	5.12e-05				4.17e-05	0.00378534	0		3.32e-05
2366.66	0.00831427	0.0195408	0.0174838	0.0112009	0.0258564	0.0800635	0.039173	0.0566727	0.0452013	0.0342641	6.29e-05				2.04e-05	0.00306538
2400	0.00668704	0.0180384	0.0155566	0.00895377	0.0229435	0.0736046	0.0362853	0.0522762	0.0418647	0.0316443	4.89e-05				1.74e-06	0.00249779
2433.33	0.00526819	0.0161629	0.013287	0.000904	0.0204382	0.0685787	0.0331327	0.0476997	0.0396378	0.0297553	7.22e-05					0.00180285
2466.66	0.00430881	0.014477	0.0110275	0.000367	0.0174637	0.0636222	0.030515	0.0439154	0.036949	0.0270766						0.00103741
2500	0.00332451	0.0129072	0.00922678	0.000245	0.0153783	0.0587156	0.0279412	0.0396328	0.034024	0.0252001						0.000286
2533.33	0.00247306	0.0115954	0.00669726	0.000152	0.013395	0.0539872	0.0250188	0.0360851	0.031534	0.0231521						2.74e-05
2566.66	0.00183895	0.0104926	0.00200325	0.000191	0.0111933	0.0496747	0.0229863	0.0328278	0.0295237	0.0203483						5.45e-06
2600	0.00113696	0.00903797	5.81e-05	0.000105	0.00965258	0.0456068	0.0206208	0.0294147	0.0270255	0.0186938						1.12e-05
2633.33	0.000794	0.00785528	3.78e-05	0.000116	0.00812536	0.0424926	0.018846	0.0266195	0.0245353	0.0170469
2666.66	0.000499	0.00659317	1.18e-05	8.35e-05	0.00628935	0.0388285	0.0169481	0.0237849	0.0225513	0.0156135
2700	1.85e-05	0.00538901		6.8e-05	0.00496045	0.0359542	0.0154955	0.021062	0.0204347	0.0141968
2733.33		0.00461208		3.9e-05	0.0033924	0.0332131	0.014036	0.0184194	0.0182326	0.0127443
2766.66		0.00369386		3.73e-05	0.00224847	0.0307754	0.012553	0.0162979	0.0161799	0.0114662
2800		0.00272591		1.06e-05	0.00053	0.027744	0.0113885	0.0139056	0.014012	0.0103616
2833.33		0.00197699		1.56e-05	4.11e-05	0.0258265	0.00985106	0.0121711	0.0119281	0.00938642
2866.66		0.00052		1.35e-05	3.61e-05	0.0237425	0.00896227	0.0102921	0.0102979	0.00784139
2900		1.13e-05		7.32e-06	2.62e-06	0.0217947	0.0077325	0.00848105	0.00774904	0.00703263
2933.33				1.37e-05	3.98e-06	0.0198838	0.0068173	0.00655394	0.00513581	0.00592059
2966.66					3.81e-06	0.0177326	0.00568784	0.00505171	0.00013	0.00465253
3000					8.75e-06	0.0160053	0.00513212	0.00285291		0.0034204
3033.33					1.72e-06	0.0142848	0.00501864	0.00151048		0.00222092
3066.66					5.17e-06	0.0128494	0.00428932	7.14e-05		5.34e-06
3100					7.52e-06	0.0114101	0.00406001
3133.33					5.48e-06	0.0099853	0.00379741
3166.66					6.38e-06	0.0092371	0.00325407
3200					1.13e-06	0.00803713	0.00292925
3233.33					1.42e-06	0.00730414	0.00260151
3266.66						0.00606725	0.00239747
3300						0.00527275	0.00208706
3333.33						0.00465615	0.00172979
3366.66						0.00370577	0.0014108
3400						0.00316826	0.00116778
3433.33						0.00255064	0.000146
3466.66						0.00207023	0.000105
3500						0.00145071	3.51e-05
3533.33						0.000936	1.4e-05
3566.66						0.000688	3.45e-08
3600						0.000179

## Sheet: Figure 4E
msec	Vehicle	TNF-α	Dapagliflozin	Dapagliflozin+ TNF-α
0
33.3333	1.06127	0.909172	2.33048	1.41072
66.6666	4.11133	5.34751	3.29408	3.66953
99.9999	2.43452	2.9237	1.96469	2.09293
133.333	1.66357	1.99622	1.61525	1.5931
166.667	1.50422	1.82754	1.45442	1.40093
200	1.32496	1.64964	1.17975	1.16073
233.333	1.17303	1.49859	1.01389	0.972955
266.666	1.04739	1.37623	0.841036	0.839478
300	0.901421	1.20362	0.687064	0.657181
333.333	0.76224	1.04066	0.516915	0.531355
366.666	0.643561	0.906439	0.383322	0.392547
400	0.544968	0.786528	0.250752	0.262395
433.333	0.430327	0.660883	0.144454	0.177869
466.666	0.340704	0.546607	0.0392877	0.0583761
500	0.257998	0.437065	-0.0684798	-0.016505
533.333	0.170614	0.345244	-0.115466	-0.0927423
566.666	0.107571	0.252438	-0.171153	-0.134695
599.999	0.0422062	0.163671	-0.228725	-0.18668
633.333	-0.0104275	0.0923893	-0.294684	-0.204988
666.666	-0.0774533	0.0102508	-0.39733	-0.244272
699.999	-0.122031	-0.0392691	-0.589809	-0.280978
733.333	-0.172142	-0.0851652	-0.751872	-0.323207
766.666	-0.199825	-0.143656	-0.86704	-0.456437
799.999	-0.211843	-0.153245	-0.97861	-0.647238
833.332	-0.237981	-0.211702	-1.04097	-0.874142
866.666	-0.271792	-0.214645	-0.974049	-1.06163
899.999	-0.313042	-0.226558	-0.859631	-1.0601
933.332	-0.338629	-0.246933	-0.756583	-0.946252
966.666	-0.393539	-0.262549	-0.667298	-0.797114
999.999	-0.586272	-0.274447	-0.620298	-0.701397
1033.33	-0.900477	-0.329344	-0.546008	-0.646975
1066.67	-1.16169	-0.364964	-0.512371	-0.585613
1100	-1.19881	-0.525663	-0.463726	-0.528235
1133.33	-1.07886	-0.713596	-0.422738	-0.488611
1166.67	-0.944917	-0.93491	-0.401288	-0.455714
1200	-0.82401	-1.15679	-0.365138	-0.415514
1233.33	-0.751341	-1.31782	-0.330019	-0.374946
1266.67	-0.668447	-1.30857	-0.305281	-0.337752
1300	-0.61547	-1.1756	-0.281681	-0.315389
1333.33	-0.562054	-1.05489	-0.263671	-0.28634
1366.67	-0.527373	-0.93113	-0.238771	-0.272222
1400	-0.482664	-0.853691	-0.225925	-0.23293
1433.33	-0.440338	-0.787123	-0.207511	-0.228333
1466.67	-0.41732	-0.717387	-0.196474	-0.205337
1500	-0.384603	-0.65962	-0.178361	-0.190827
1533.33	-0.356411	-0.629164	-0.163457	-0.178634
1566.67	-0.324856	-0.57777	-0.154166	-0.163064
1600	-0.312783	-0.546842	-0.142973	-0.148721
1633.33	-0.283557	-0.498605	-0.143786	-0.131472
1666.66	-0.266338	-0.479314	-0.163422	-0.138393
1700	-0.244801	-0.447568	-0.155743	-0.126088
1733.33	-0.231163	-0.417824	-0.114738	-0.138373
1766.66	-0.22056	-0.381989	-0.0926246	-0.0901833
1800	-0.199106	-0.367867	-0.0872806	-0.0800124
1833.33	-0.185725	-0.341239	-0.0781957	-0.0783258
1866.66	-0.173379	-0.323413	-0.0768732	-0.0677535
1900	-0.162997	-0.302567	-0.055315	-0.06745
1933.33	-0.153316	-0.27376	-0.0512406	-0.0569823
1966.66	-0.140294	-0.264997	0.0232167	-0.0512242
2000	-0.13088	-0.257904	-0.0593894	-0.0567504
2033.33	-0.127523	-0.21641	-0.0798096	-0.0480711
2066.66	-0.111726	-0.22163	-0.0585262	-0.0425245
2100	-0.113349	-0.212853	-0.0368994	-0.0602786
2133.33	-0.096856	-0.189258	-0.0320157	-0.0414303
2166.66	-0.0959623	-0.186919	-0.0261104	-0.0358481
2200	-0.0801415	-0.162128	-0.0011877	-0.0438454
2233.33	-0.0867444	-0.157274	-0.0343346	-0.0421392
2266.66	-0.0751967	-0.158986	-0.0309151	-0.0051632
2300	-0.076215	-0.139012	-0.0102464	-0.0180046
2333.33	-0.0634756	-0.137243	-0.0007113	-0.0004023
2366.66	-0.0620629	-0.119593	-0.0001441	0.0537757
2400	-0.0613008	-0.118197	-0.0004895	-0.0170278
2433.33	-0.0967169	-0.101225	0.00140548	-0.0208482
2466.66	-0.0504969	-0.100357		-0.0229633
2500	-0.0393693	-0.0993858		-0.0225411
2533.33	-0.0406162	-0.0944202		-0.00776
2566.66	-0.051564	-0.086498		-0.0006577
2600	-0.0343724	-0.0839955		0.00017266
2633.33	-0.0183704	-0.0709278
2666.66	-0.0207096	-0.0708833
2700	-0.0025918	-0.0635002
2733.33	0.00216582	-0.0629869
2766.66	-0.0206384	-0.0562376
2800	-0.0271283	-0.0591633
2833.33	-0.0123309	-0.0494922
2866.66	-0.0146435	-0.0481621
2900	-0.0054818	-0.0500774
2933.33	5.3436e-05	-0.050871
2966.66	-0.0001515	-0.0663411
3000	0.0001483	0.00605308
3033.33	-0.0002108	-0.0328188
3066.66	0.00010344	-0.043646
3100	7.0454e-05	0.102936
3133.33	-6.122e-05	-0.025311
3166.66	2.6915e-05	-0.019373
3200	-0.0001575	-0.022872
3233.33	8.7078e-06	-0.015911
3266.66		-0.021614
3300		-0.0165737
3333.33		-0.014608
3366.66		-0.0190407
3400		-0.0117078
3433.33		-0.0245906
3466.66		-0.0078147
3500		-0.0103481
3533.33		-0.0080348
3566.66		-0.0039313
3600		-0.0049632

## Sheet: Figure 4H
msec	Vehicle					IFN-γ					Dapagliflozin					Dapagliflozin+ IFN-γ
0	0.00526607	0.0299421	0.0129754	0.00595462	0.00396856	0.00772219	0.00891818	0.00630079	0.00569943	0.0168325	0.00576129	0.0150497	0.00575808	0.00524892	0.00504162	0.0148496	0.00590864	0.00434995	0.0057118	0.00919896
33.3333	0.0170169	0.196692	0.0996481	0.0572541	0.0479038	0.0427092	0.0540417	0.0279199	0.0247477	0.106243	0.0398528	0.101354	0.0430723	0.0613781	0.0281987	0.0950739	0.0338229	0.0492515	0.0277938	0.0442233
66.6666	0.0567945	0.346758	0.240178	0.190002	0.181817	0.210685	0.157054	0.163925	0.147095	0.24058	0.139403	0.208495	0.166932	0.160813	0.115764	0.210382	0.124601	0.183388	0.164108	0.151563
99.9999	0.0811239	0.432347	0.324484	0.264387	0.266997	0.324282	0.195863	0.250272	0.225075	0.315008	0.209884	0.276134	0.241897	0.21375	0.167333	0.275278	0.163576	0.249978	0.244345	0.220534
133.333	0.100332	0.510015	0.384916	0.325207	0.328485	0.39335	0.228548	0.306325	0.272433	0.374568	0.259696	0.333075	0.2987	0.25933	0.206264	0.330635	0.195818	0.308964	0.30281	0.272602
166.667	0.116661	0.583339	0.440906	0.383856	0.386382	0.457456	0.259483	0.357282	0.315443	0.429826	0.302616	0.385292	0.350685	0.301496	0.242209	0.381769	0.223862	0.363421	0.356755	0.320353
200	0.129403	0.647545	0.49224	0.434185	0.437956	0.516138	0.284052	0.404433	0.353798	0.479076	0.336149	0.427835	0.397862	0.335606	0.272708	0.4254	0.245752	0.41143	0.402975	0.359303
233.333	0.140573	0.706256	0.537633	0.481439	0.484408	0.571418	0.306821	0.448259	0.389399	0.523115	0.363152	0.464217	0.436995	0.364442	0.299455	0.464774	0.262573	0.451999	0.443409	0.39507
266.666	0.150651	0.757857	0.579229	0.523255	0.526029	0.621806	0.328508	0.488822	0.422101	0.563152	0.38516	0.496447	0.47331	0.388716	0.323103	0.499519	0.277716	0.489326	0.478696	0.425257
300	0.158966	0.804024	0.614208	0.557646	0.560187	0.667217	0.346506	0.525199	0.451417	0.598719	0.402225	0.52173	0.502769	0.407975	0.342432	0.528539	0.28848	0.520149	0.507277	0.450659
333.333	0.165834	0.842358	0.643715	0.589191	0.5897	0.707664	0.362046	0.556363	0.476209	0.62894	0.413958	0.541341	0.527376	0.42256	0.35832	0.553299	0.294485	0.54707	0.530132	0.471359
366.666	0.170568	0.874382	0.668519	0.614467	0.612963	0.74464	0.375468	0.583296	0.497834	0.655323	0.420782	0.55633	0.546869	0.43281	0.371636	0.573321	0.29815	0.569549	0.550556	0.488081
400	0.174012	0.902526	0.689145	0.636298	0.633029	0.776171	0.386672	0.608178	0.517842	0.679065	0.423491	0.565514	0.563073	0.438595	0.380633	0.59009	0.298531	0.588792	0.564901	0.502437
433.333	0.175727	0.923729	0.705717	0.651748	0.646829	0.804819	0.395799	0.628606	0.53387	0.698365	0.422552	0.570983	0.572978	0.441308	0.388685	0.602512	0.296799	0.603586	0.575721	0.513324
466.666	0.176465	0.942067	0.718812	0.665845	0.657054	0.830142	0.403268	0.646465	0.547976	0.714373	0.417671	0.571745	0.581011	0.440932	0.393526	0.611766	0.293095	0.615415	0.583785	0.519783
500	0.174793	0.954893	0.727882	0.675194	0.664682	0.852283	0.408859	0.661487	0.560488	0.72766	0.409573	0.568956	0.583256	0.436779	0.395835	0.61626	0.287447	0.624542	0.587029	0.524196
533.333	0.172083	0.96381	0.734556	0.681272	0.666784	0.87091	0.412857	0.672612	0.569544	0.73822	0.396432	0.564596	0.582375	0.431079	0.39602	0.618431	0.279564	0.630117	0.587753	0.527224
566.666	0.167092	0.968532	0.737841	0.684404	0.667228	0.886984	0.415433	0.681675	0.576817	0.745234	0.375345	0.558345	0.579106	0.423055	0.394599	0.619021	0.269981	0.632794	0.586879	0.527584
599.999	0.160076	0.969706	0.737972	0.683512	0.665076	0.89994	0.416279	0.688745	0.58166	0.750535	0.344037	0.548376	0.572794	0.411019	0.391197	0.615819	0.257109	0.632599	0.582628	0.525856
633.333	0.151713	0.969115	0.736618	0.681409	0.65984	0.909161	0.415638	0.693909	0.585668	0.754578	0.311569	0.539217	0.561331	0.39625	0.386853	0.611181	0.240277	0.6299	0.57707	0.522603
666.666	0.143784	0.964192	0.733214	0.677473	0.654112	0.917453	0.414133	0.696089	0.587245	0.756043	0.280948	0.526128	0.541862	0.376316	0.379187	0.60569	0.219129	0.627036	0.570566	0.518275
699.999	0.135965	0.958436	0.727603	0.670684	0.646413	0.92255	0.411526	0.697007	0.587798	0.755875	0.254434	0.507823	0.515874	0.354606	0.368123	0.600798	0.195933	0.621596	0.562388	0.512865
733.333	0.129134	0.949309	0.720569	0.663502	0.636053	0.926065	0.407192	0.696864	0.586486	0.753592	0.230877	0.477178	0.482366	0.331566	0.351711	0.593512	0.171331	0.615484	0.552491	0.5065
766.666	0.122482	0.94032	0.712232	0.654436	0.625423	0.925957	0.402814	0.695128	0.58381	0.749599	0.210234	0.43927	0.445631	0.306178	0.330169	0.585205	0.148372	0.608334	0.540081	0.498161
799.999	0.116427	0.929476	0.703332	0.645443	0.608347	0.926175	0.39751	0.692425	0.579687	0.746265	0.191414	0.401214	0.410177	0.27729	0.304617	0.576061	0.128348	0.600174	0.522891	0.486764
833.332	0.110587	0.919054	0.694223	0.634324	0.582151	0.92363	0.391386	0.688398	0.574596	0.740356	0.174204	0.36672	0.378047	0.247372	0.280629	0.56749	0.109959	0.588763	0.495586	0.467981
866.666	0.104866	0.906705	0.682866	0.619886	0.544107	0.919972	0.384941	0.684275	0.569369	0.734972	0.157358	0.336201	0.349274	0.219682	0.259198	0.557031	0.0940781	0.574577	0.458987	0.44374
899.999	0.0994626	0.89281	0.669206	0.59864	0.502111	0.914494	0.377884	0.679542	0.561998	0.729194	0.142308	0.308908	0.323501	0.195566	0.239733	0.540547	0.0794764	0.547903	0.420966	0.413742
933.332	0.0938944	0.879301	0.649167	0.567371	0.463059	0.907199	0.369515	0.673646	0.554799	0.721237	0.127478	0.285153	0.300189	0.174044	0.222412	0.517295	0.065	0.510413	0.387161	0.383121
966.666	0.0891032	0.863131	0.619752	0.531122	0.428561	0.901053	0.360348	0.665824	0.544055	0.715205	0.114441	0.264106	0.278623	0.154232	0.206929	0.486117	0.0567201	0.472133	0.357454	0.354702
999.999	0.0839736	0.845525	0.57626	0.494885	0.397263	0.892539	0.350629	0.659425	0.52963	0.707579	0.101649	0.242293	0.25934	0.136872	0.192896	0.449006	0.0493264	0.437484	0.330949	0.329706
1033.33	0.0796869	0.817848	0.526346	0.460647	0.370827	0.883709	0.337206	0.650952	0.51364	0.698989	0.0899246	0.223725	0.241134	0.120168	0.179806	0.414028	0.0427028	0.407086	0.308236	0.306624
1066.67	0.0755273	0.773277	0.479245	0.428829	0.345676	0.874114	0.319979	0.63786	0.495522	0.690046	0.0790316	0.206914	0.225031	0.101094	0.167295	0.381554	0.0362804	0.381213	0.286528	0.285851
1100	0.0717815	0.71174	0.439543	0.400971	0.32233	0.865382	0.298594	0.617631	0.476786	0.677763	0.0687992	0.189833	0.210116	0.0922286	0.156336	0.353768	0.0308379	0.356212	0.266999	0.267123
1133.33	0.0676259	0.650288	0.404226	0.375573	0.301272	0.854181	0.273726	0.587547	0.452313	0.660318	0.0592231	0.175263	0.195779	0.0852046	0.14589	0.327526	0.0255231	0.334802	0.249294	0.24919
1166.67	0.0641471	0.596411	0.373668	0.352453	0.281911	0.84215	0.246249	0.550426	0.424752	0.630959	0.0503693	0.16104	0.18237	0.0788183	0.135528	0.304044	0.0204689	0.313602	0.231899	0.232582
1200	0.0608107	0.549202	0.345888	0.331202	0.262482	0.827274	0.220523	0.513789	0.394514	0.589317	0.0418321	0.147503	0.170233	0.0716593	0.126253	0.283284	0.0160514	0.294117	0.21682	0.217625
1233.33	0.0579965	0.507213	0.320561	0.312471	0.245221	0.810844	0.196132	0.480501	0.367492	0.545323	0.0348488	0.134872	0.159544	0.0652854	0.117846	0.264996	0.0119276	0.275243	0.201871	0.203081
1266.67	0.0551648	0.47048	0.297403	0.294582	0.228129	0.789026	0.17398	0.450594	0.343264	0.505776	0.02702	0.123338	0.148595	0.0603652	0.109462	0.246827	0.00804745	0.257152	0.188187	0.189242
1300	0.0520201	0.435595	0.275794	0.277247	0.212663	0.756681	0.15392	0.423183	0.321715	0.47006	0.0204391	0.112515	0.138319	0.0562205	0.10168	0.230906	0.0044797	0.240961	0.175491	0.176862
1333.33	0.0495896	0.404567	0.255736	0.260677	0.197811	0.714227	0.135224	0.398629	0.302346	0.437886	0.0139027	0.103199	0.128981	0.0516197	0.0947013	0.214957	0.00200527	0.224561	0.163532	0.164651
1366.67	0.0469025	0.374497	0.236603	0.246245	0.183922	0.668125	0.118015	0.376218	0.284415	0.409413	0.00930991	0.0935803	0.120155	0.0477859	0.0881505	0.201447	0.00103511	0.209496	0.152363	0.153833
1400	0.0448257	0.347657	0.219628	0.231995	0.170803	0.625001	0.102025	0.355411	0.267604	0.383617	0.00648317	0.0849023	0.11169	0.0446423	0.0819149	0.18836	0.000151	0.195337	0.142043	0.143511
1433.33	0.042387	0.32242	0.202675	0.219098	0.158955	0.585532	0.086796	0.336262	0.251902	0.359583	0.00497962	0.0767528	0.103516	0.0414244	0.0761903	0.176187	5.07e-05	0.182186	0.132324	0.13371
1466.67	0.0406528	0.299353	0.187879	0.206411	0.147053	0.55053	0.0731037	0.31812	0.237331	0.337474	0.00384835	0.0693477	0.0964133	0.037712	0.0705082	0.165056		0.170235	0.123389	0.124601
1500	0.0384233	0.277656	0.173453	0.194353	0.13635	0.519304	0.0602142	0.30073	0.224301	0.316768	0.00303336	0.0620554	0.0900041	0.0349401	0.065518	0.154414		0.157947	0.11493	0.115916
1533.33	0.0365575	0.257361	0.159953	0.18317	0.125852	0.489231	0.0480198	0.28448	0.211493	0.29715	0.00186097	0.05535	0.0832272	0.0322001	0.0608525	0.144573		0.146541	0.10673	0.107845
1566.67	0.0347176	0.238599	0.14799	0.172257	0.116479	0.462683	0.0350006	0.268808	0.199144	0.278914	0.000831	0.0490264	0.0771663	0.0293682	0.0563741	0.135081		0.135607	0.0991057	0.100494
1600	0.032963	0.220847	0.136165	0.162551	0.107188	0.437338	0.0211975	0.254518	0.188319	0.262444	6.5e-05	0.0433406	0.0718031	0.0270604	0.051785	0.126898		0.125712	0.09209	0.0930852
1633.33	0.0310802	0.2043	0.125114	0.153105	0.098453	0.413686	0.00634927	0.241447	0.178154	0.246097	8.24e-06	0.0377798	0.0657289	0.0247053	0.047603	0.118486		0.116188	0.0853127	0.0862567
1666.66	0.029405	0.188417	0.115378	0.144124	0.0907699	0.391427	0.000505	0.228021	0.16803	0.231016	9.86e-06	0.0329023	0.0608094	0.022634	0.0438506	0.111002		0.106481	0.0786523	0.0801873
1700	0.0279437	0.174636	0.105881	0.135692	0.0824918	0.370527	0.000429	0.216042	0.158702	0.217154	9.14e-06	0.0278688	0.055856	0.0205832	0.0405103	0.103609		0.0985497	0.0732167	0.0741245
1733.33	0.0266555	0.161843	0.0968401	0.127585	0.0751472	0.35092	0.000403	0.20438	0.1504	0.204184	1.53e-05	0.0228859	0.0518054	0.0189087	0.0369648	0.0970056		0.090462	0.0673195	0.0685129
1766.66	0.0249827	0.149006	0.0830629	0.120421	0.0687687	0.332397	0.000196	0.193535	0.140946	0.191601	7.91e-06	0.0189135	0.0468691	0.0172667	0.0338034	0.0906628		0.0830283	0.0624383	0.0631774
1800	0.0240629	0.137391	0.06335	0.112933	0.0619666	0.314325	0.000178	0.182683	0.133186	0.180276	1.51e-05	0.0151458	0.0429523	0.0155327	0.0309609	0.084871		0.0756584	0.0572623	0.0578689
1833.33	0.022967	0.126507	0.0581871	0.106509	0.0562	0.297365	9.86e-05	0.172951	0.125882	0.169084		0.0113003	0.0394096	0.0137024	0.0280432	0.0799612		0.0690636	0.0531852	0.0527432
1866.66	0.0216107	0.117153	0.0538806	0.099469	0.0500715	0.281301	7.11e-05	0.163798	0.118783	0.159169		0.00783738	0.0353977	0.0117114	0.025557	0.0751482		0.063002	0.0487416	0.048626
1900	0.0206953	0.107327	0.0499785	0.0938113	0.0448185	0.26596	3.26e-05	0.155497	0.111668	0.149408		0.00464081	0.0322316	0.00234819	0.0232982	0.0696184		0.0563644	0.0443536	0.0439549
1933.33	0.0194869	0.0985472	0.0464172	0.0874564	0.0401069	0.251421	1.36e-05	0.147187	0.105335	0.140016		0.00201909	0.029271	5.81e-06	0.0208862	0.0651263		0.0508171	0.0407238	0.0396465
1966.66	0.0183607	0.090655	0.0432445	0.0820875	0.0347255	0.237999	2.2e-06	0.138988	0.0998584	0.131888		0.000381	0.0260651		0.0187179	0.0606452		0.0452399	0.0370621	0.035855
2000	0.0173476	0.0826341	0.0397615	0.0767621	0.0303708	0.22494	4.41e-06	0.131534	0.0939229	0.123368			0.0235652		0.0164191	0.0563976		0.0401362	0.0335922	0.0320605
2033.33	0.0164211	0.0752772	0.0366837	0.0719785	0.0262526	0.212863	0	0.124105	0.0884068	0.116019			0.0206779		0.0145747	0.0521248		0.0346117	0.0306571	0.0288989
2066.66	0.0154884	0.0683075	0.0338114	0.0672191	0.0221792	0.201453		0.117093	0.0830088	0.108436			0.0184079		0.0124931	0.0487696		0.0296069	0.0270371	0.0255361
2100	0.014809	0.0618701	0.030863	0.0625022	0.0182657	0.190345		0.111425	0.0785647	0.101984			0.0158837		0.0107797	0.0452677		0.0249956	0.0242919	0.0225934
2133.33	0.014203	0.0559593	0.0282946	0.0583252	0.0142018	0.179972		0.10523	0.0738186	0.0955034			0.0138325		0.00896284	0.0422089		0.0210262	0.0212136	0.0199093
2166.66	0.0135437	0.0502754	0.0261085	0.0547343	0.0109741	0.169869		0.0997972	0.0696846	0.0897009			0.0121875		0.00749134	0.0393961		0.0167906	0.0185635	0.016851
2200	0.0123751	0.0444511	0.0236556	0.0510493	0.00809926	0.160366		0.0942418	0.0651417	0.0839925			0.0101828		0.00535056	0.0363129		0.0130678	0.0159926	0.0151679
2233.33	0.011613	0.0396954	0.0213258	0.0472657	0.00537644	0.152352		0.0888343	0.061404	0.0790602			0.00815678		0.00264083	0.0336392		0.00955628	0.0130921	0.0134294
2266.66	0.0108069	0.0349394	0.0194093	0.0440187	0.00331039	0.14345		0.0837984	0.057265	0.0737999			0.00641208		6.54e-05	0.0309901		0.00682156	0.0108025	0.0122954
2300	0.0100684	0.0305584	0.0172894	0.0404724	0.00221046	0.13562		0.0790026	0.0542661	0.0687942			0.00530293		1.87e-05	0.0289341		0.00504003	0.00873652	0.0112195
2333.33	0.0094487	0.0265709	0.0155586	0.0369283	0.00079	0.128736		0.075142	0.0508252	0.0636441			0.00392509			0.0266841		0.00345189	0.00616413	0.0100608
2366.66	0.00885241	0.022637	0.0141006	0.0340684	8.31e-05	0.121382		0.0709225	0.047677	0.060026			0.00241875			0.0245774		0.0028753	0.00169367	0.00911879
2400	0.00818499	0.0193281	0.0123598	0.031372	8.61e-05	0.114829		0.0665453	0.0446688	0.0556703			0.00173924			0.0231154		0.00196953	8.11e-06	0.00811852
2433.33	0.00753865	0.0164978	0.0107007	0.0283688	4.8e-05	0.108439		0.0624273	0.0416578	0.0517031			0.000299			0.020697		0.00184256		0.00724356
2466.66	0.0069154	0.0133018	0.00939726	0.0263686	3.68e-05	0.101981		0.0582284	0.0391105	0.0482767			8.8e-05			0.0190027		0.00154223		0.00623836
2500	0.00688413	0.0105919	0.00798803	0.0238159	7.76e-06	0.0960147		0.0552182	0.0360753	0.0451012						0.0174673		0.00124784		0.00459046
2533.33	0.00629856	0.00769745	0.00670216	0.0216497	4.37e-05	0.0908515		0.0517514	0.0337836	0.0420847						0.0159884		0.000924		0.00113896
2566.66	0.0056076	0.00589469	0.00558162	0.0194564	1.28e-05	0.0861596		0.0488367	0.0316672	0.0388859						0.0147094		0.00053		0.00076
2600	0.00515071	0.00433287	0.0045477	0.0175045	2.96e-05	0.0811965		0.0453013	0.0289238	0.0363081						0.0132018		0.00038		0.000759
2633.33	0.00485097	0.00325136	0.00330999	0.0152718	1.43e-05	0.0764994		0.0428747	0.0269771	0.0333199						0.0119051		7.48e-05		0.000526
2666.66	0.00455916	0.00279031	0.000925	0.0132316	3.02e-05	0.0719325		0.040351	0.0249642	0.0312975						0.0100384		1.69e-06		0.000517
2700	0.00401728	0.00252635	5.42e-05	0.0115322	8.67e-07	0.0677546		0.0378023	0.0227952	0.0288724						0.00899732				0.000465
2733.33	0.00365871	0.0021083	3.51e-07	0.0099144		0.0640324		0.0351761	0.0210258	0.0267034						0.00753799				0.000398
2766.66	0.00317287	0.00200359	0	0.00825311		0.0598038		0.0339507	0.0194288	0.0246173						0.00643888				0.000245
2800	0.00283009	0.00156223		0.00641817		0.056901		0.0314059	0.017798	0.0229745						0.00514452				0.000325
2833.33	0.00255603	0.00168975		0.0049548		0.0531399		0.0290973	0.0165298	0.0208004						0.00348364				0.00026
2866.66	0.00221628	0.00160516		0.00312929		0.0495257		0.0272734	0.0151419	0.0188614						0.000917				0.000234
2900	0.00175048	0.00102845		0.000329		0.0469781		0.025518	0.013662	0.017326						9.7e-05				7.24e-05
2933.33	0.00160927	0.00122595				0.0434132		0.0240126	0.0119777	0.0157625						2.39e-05				4.65e-05
2966.66	0.00138945	0.00102664				0.0410277		0.0221918	0.0111892	0.01428						1.1e-06				0
3000	0.00102576	0.000728				0.0387335		0.0208623	0.00938952	0.0131664
3033.33	0.000891	0.000641				0.0357971		0.01931	0.00858342	0.0118716
3066.66	0.000785	0.000746				0.0339987		0.0179131	0.00731478	0.0104801
3100	0.000673	0.000503				0.0312193		0.0166054	0.00607221	0.00938613
3133.33	0.000458	0.000416				0.029306		0.0157988	0.00508583	0.00816285
3166.66	0.000346	0.000441				0.0274997		0.0142819	0.00413635	0.00691946
3200	0.000272	0.000258				0.0255281		0.013063	0.00304121	0.00608317
3233.33	0.000234	0.000118				0.0235527		0.0119946	0.00174529	0.00510743
3266.66	5.58e-06	4.14e-05				0.0219619		0.010736	0.000157	0.00384279
3300	1.6e-05	2.55e-06				0.020422		0.00983101	7.42e-05	0.00288278
3333.33	9.22e-06					0.0190136		0.00894997	4.73e-05	0.00218968
3366.66	8.47e-06					0.0182264		0.00804689	6.4e-05	0.000955
3400	4.31e-06					0.0168217		0.00737656	3.38e-05	0.00026
3433.33	8.49e-06					0.0157168		0.00639361	3.83e-05	0.000209
3466.66	3.24e-07					0.0143547		0.00552803	4.63e-05	5.99e-05
3500	0					0.0137108		0.00483199	1.62e-05
3533.33	6.84e-07					0.0121009		0.00452576	2.59e-05
3566.66	0					0.0116819		0.00333232	2.82e-06
3600	3.24e-06					0.0100496		0.0028126
	1.29e-07					0.00925711		0.00227492
	3.38e-06					0.00808495		0.00166798
	1.24e-06					0.00751557		0.00132094
	0					0.00653794		0.000994
	4.42e-07					0.00604766		0.000426
	0					0.00495782		4.5e-05
	2.63e-06					0.00429953		7.62e-06
						0.00362217		5.1e-06
						0.00267127
						0.00148936
						2.36e-05

## Sheet: Figure 4I
msec	Vehicle	IFN-γ	Dapagliflozin	Dapagliflozin+ IFN-γ
0
33.3333	2.16245	1.26113	1.42198	1.26088
66.6666	3.58221	3.98208	3.10531	3.50326
99.9999	2.12275	2.34696	1.90556	1.91801
133.333	1.6777	1.58834	1.4884	1.54272
166.667	1.57313	1.46561	1.3514	1.41198
200	1.38111	1.30803	1.12717	1.19221
233.333	1.25389	1.2091	0.948606	1.03779
266.666	1.12027	1.11226	0.830851	0.916138
300	0.948062	0.98802	0.662371	0.747538
333.333	0.814602	0.852988	0.518543	0.60746
366.666	0.660605	0.752034	0.389231	0.49986
400	0.564665	0.668203	0.257268	0.390561
433.333	0.412435	0.561186	0.151201	0.28315
466.666	0.338963	0.484584	0.0502745	0.191411
500	0.223207	0.411317	-0.0629011	0.0937806
533.333	0.12637	0.320202	-0.143395	0.0216968
566.666	0.0395605	0.251998	-0.240308	-0.0409861
599.999	-0.0525393	0.186099	-0.378163	-0.133492
633.333	-0.105882	0.130771	-0.433211	-0.197879
666.666	-0.15552	0.0720575	-0.544685	-0.242001
699.999	-0.202043	0.02275	-0.621486	-0.282703
733.333	-0.24321	-0.0273506	-0.762974	-0.325564
766.666	-0.262035	-0.0773415	-0.853296	-0.354996
799.999	-0.311208	-0.0914696	-0.880617	-0.395486
833.332	-0.376124	-0.142176	-0.826443	-0.506762
866.666	-0.491459	-0.149019	-0.75156	-0.608189
899.999	-0.577198	-0.182507	-0.67018	-0.754676
933.332	-0.656619	-0.220292	-0.604439	-0.837869
966.666	-0.726744	-0.239472	-0.54567	-0.815187
999.999	-0.802578	-0.280092	-0.511686	-0.783926
1033.33	-0.855315	-0.331837	-0.469757	-0.706769
1066.67	-0.916801	-0.401848	-0.452354	-0.64351
1100	-0.937128	-0.488196	-0.372311	-0.578911
1133.33	-0.884287	-0.648425	-0.335725	-0.531632
1166.67	-0.782366	-0.801291	-0.319404	-0.50244
1200	-0.714036	-0.89472	-0.303866	-0.448189
1233.33	-0.636728	-0.87075	-0.270507	-0.424675
1266.67	-0.586229	-0.825913	-0.2617	-0.405978
1300	-0.554636	-0.822487	-0.237637	-0.364528
1333.33	-0.509634	-0.823487	-0.220622	-0.353965
1366.67	-0.481275	-0.792752	-0.200533	-0.309192
1400	-0.439554	-0.735171	-0.176093	-0.292635
1433.33	-0.416251	-0.681494	-0.160616	-0.269663
1466.67	-0.385112	-0.6211	-0.150201	0.627859
1500	-0.366689	-0.571452	-0.133673	-0.300556
1533.33	-0.344045	-0.54566	-0.13236	-0.281383
1566.67	-0.317105	-0.514945	-0.124349	-0.265519
1600	-0.301971	-0.484406	-0.112272	-0.243768
1633.33	-0.285971	-0.468492	-0.109373	-0.23656
1666.66	-0.263755	-0.400409	-0.0937141	-0.2244
1700	-0.248695	-0.336873	-0.0922722	-0.201173
1733.33	-0.231438	-0.315398	-0.0854844	-0.1965
1766.66	-0.250981	-0.309672	-0.0823177	-0.179949
1800	-0.279222	-0.288154	-0.0735223	-0.177346
1833.33	-0.176001	-0.271611	0.0657754	-0.155306
1866.66	-0.169114	-0.253559	-0.0896401	-0.145766
1900	-0.153328	-0.243328	-0.134885	-0.159199
1933.33	-0.147695	-0.231565	-0.0775256	-0.134831
1966.66	-0.137648	-0.211423	0.0602698	-0.131337
2000	-0.133183	-0.209794	0.148129	-0.124618
2033.33	-0.121578	-0.19425	-0.0709758	-0.119205
2066.66	-0.117646	0.57656	-0.0652735	-0.115071
2100	-0.112173	-0.207531	-0.0635647	-0.103508
2133.33	-0.103957	-0.208463	-0.0580207	-0.0959299
2166.66	-0.0920868	-0.191046	-0.0467481	-0.0956761
2200	-0.0960336	-0.189825	-0.0621823	-0.0829505
2233.33	-0.086125	-0.165682	-0.0710358	-0.0811814
2266.66	-0.0767494	-0.175029	-0.0648014	-0.0660556
2300	-0.0713144	-0.15473	-0.017338	-0.0523457
2333.33	-0.0678145	-0.145016	0.0379282	-0.0567695
2366.66	-0.0573305	-0.137548	-0.0451902	-0.0607181
2400	-0.0504634	-0.137208	-0.0203855	-0.0379023
2433.33	-0.0490616	-0.131143	-0.043207	0.0487447
2466.66	-0.0428055	-0.124732	-0.0063308	-0.029998
2500	-0.0403926	-0.113904		-0.0347773
2533.33	-0.0413763	-0.104538		-0.0525433
2566.66	-0.0350311	-0.0969136		-0.0205152
2600	-0.0299268	-0.103647		-0.0165893
2633.33	-0.0292015	-0.0904392		-0.0183477
2666.66	-0.0309708	-0.0834451		-0.0194927
2700	-0.0204347	-0.0849052		0.0363713
2733.33	0.00882808	-0.0771513		-0.022898
2766.66	-0.0168915	-0.0685275		-0.0187893
2800	0.00738313	-0.0654096		-0.0182095
2833.33	-0.0160991	-0.0713397		-0.0258859
2866.66	-0.0224985	-0.0657381		-0.0388937
2900	-0.0384295	-0.0548874		-0.0147214
2933.33	0.0114504	-0.0623858		-0.0014866
2966.66	-0.006287	-0.0485787		-0.0010385
3000	-0.009941	-0.049029
3033.33	-0.0033225	-0.049422
3066.66	-9.49e-06	-0.043916
3100	-0.0053252	-0.0481765
3133.33	-0.004532	-0.0369723
3166.66	-0.0013076	-0.0413702
3200	-0.0038561	-0.0384148
3233.33	-0.002667	-0.0398662
3266.66	-0.0045754	-0.0427644
3300	-0.0004263	-0.0261603
3333.33	-1.864e-06	-0.0225709
3366.66	-2.249e-05	-0.0218095
3400	-0.0001249	-0.0210006
3433.33	0.00012552	-0.0160134
3466.66	-0.0002451	-0.0177633
3500	-9.718e-06	0.0356721
3533.33	2.0517e-05	-0.0190638
3566.66	-2.052e-05	-0.0163553
3600	9.7339e-05	0.0427629
3633.33	-9.348e-05	-0.0199529
3666.66	9.7493e-05	-0.0266864
3700	-6.402e-05	-0.0137463
3733.33	-3.733e-05	-0.0195753
3766.66	1.3266e-05	-0.0158748
3800	-1.327e-05	-0.0220555
3833.33	7.8827e-05	-0.0104347
3866.66		-0.0101983
3900		0.025729
3933.33		-0.0354571
3966.66		-0.0439717
