# Supplementary material for: Human induced pluripotent stem cell-derived cardiomyocytes to study inflammation-induced aberrant calcium transient
Source: eLife. 2024 Sep 27;13:RP95867. doi: 10.7554/eLife.95867 (PMC11434618; doi:10.7554/eLife.95867)
Supplement: Figure 5—source data 1. [file elife-95867-fig5-data1.xlsx]

## Sheet: Fig 5A
High MPR			Low MPR
M03	M13	M15	M04	M18	M20
1.19055	0.996449	0.787314	1.09272	0.950955	0.883195
1.32144	0.985324	0.781203	1.08465	0.858274	0.689011
1.10457	0.993206	0.839945	1.05815	0.850668	0.91502

## Sheet: Fig 5B
High MPR			Low MPR
M03	M13	M15	M04	M18	M20
1.2119	0.99749	0.734334	1.14639	0.978476	0.817447
1.36315	0.958331	0.71938	1.09241	0.790767	0.618431
1.1166	1.04167	0.857145	1.07452	0.865803	0.935831

## Sheet: Fig 5C
High MPR			Low MPR
M03	M13	M15	M04	M18	M20
0.890935	1.04891	1.11151	0.939389	0.954542	0.913662
0.7536	0.984611	1.14775	0.948364	1.06187	1.23102
0.884958	1.10474	1.07298	0.904127	1.16753	1.00121
