# Supplementary material for: Human induced pluripotent stem cell-derived cardiomyocytes to study inflammation-induced aberrant calcium transient
Source: eLife. 2024 Sep 27;13:RP95867. doi: 10.7554/eLife.95867 (PMC11434618; doi:10.7554/eLife.95867)
Supplement: Figure 5—source data 2. [file elife-95867-fig5-data2.xlsx]

## Sheet: Fig 5D
High	Low
6417	10075
9642	10431
10308	8673

## Sheet: Fig 5E
High	Low
49	70
54	89
81	57

## Sheet: Fig 5F
High	Low
10164	13403
11983	13139
13167	11140

## Sheet: Fig 5G
High	Low
40204	64338
31584	94023
169002	43547
