# Supplementary material for: Human induced pluripotent stem cell-derived cardiomyocytes to study inflammation-induced aberrant calcium transient
Source: eLife. 2024 Sep 27;13:RP95867. doi: 10.7554/eLife.95867 (PMC11434618; doi:10.7554/eLife.95867)
Supplement: Figure 6—source data 1. [file elife-95867-fig6-data1.xlsx]

## Sheet: Fig 6A
Cell ID	Normalized Decay Time
Non Serum	0.979871
Non Serum	1.02069
Non Serum	0.999438
Non Serum	0.726236
Non Serum	0.814148
Non Serum	0.948697
Non Serum	0.937007
Non Serum	1.09656
Non Serum	1.20359
#08	0.747347
#08	0.807281
#08	0.686237
#08	0.768435
#08	0.762325
#39	0.812222
#39	0.753313
#39	0.870424
#46	0.533947
#46	0.603028
#46	0.638243
#46	0.735294
#66	0.796766
#66	0.743991
#66	0.697154
#75	0.830578
#75	0.762375
#75	0.751413
#75	0.766508
#75	0.683173
#02	0.680969
#02	0.872934
#02	0.810109
#02	0.782803
#14	0.909695
#14	0.905388
#14	0.765144
#14	0.845531
#14	0.769112
#30	0.690573
#30	0.582311
#30	0.463927
#30	0.633674
#30	0.49298
#74	0.832972
#74	0.940053
#74	1.01528
#74	0.823064
#74	0.832308

## Sheet: Fig 6B
Group	Normalized Decay Time
Non Serum	1.27621
Non Serum	0.876467
Non Serum	0.847318
Non Serum	0.823299
Non Serum	1.07861
Non Serum	1.00974
Non Serum	1.03195
Non Serum	1.0564
Non Serum	0.996558
Non Serum	0.993035
Non Serum	0.956033
Non Serum	1.11207
Non Serum	0.942309
#08	0.88789
#08	0.82679
#08	0.956968
#08	0.922151
#39	0.925069
#39	0.808545
#39	0.866199
#39	0.972017
#39	0.94154
#46	0.87923
#46	0.895858
#46	0.842284
#46	0.826706
#66	0.807566
#66	0.8598
#66	0.828147
#66	0.861392
#66	0.844457
#75	0.805973
#75	0.690974
#75	0.851078
#75	0.596386
#75	0.814647
#83	0.771462
#83	0.76726
#83	0.716208
#83	0.69726
#83	0.850109
#556	0.859392
#556	1.05065
#556	0.940517
#556	0.890062
#556	0.923775
#956	0.843103
#956	0.774521
#956	0.868023
#956	0.82307
#956	0.866104
#02	0.747151
#02	0.80823
#02	0.948566
#14	0.906844
#14	0.789955
#14	0.730129
#14	0.792711
#14	0.849715
#30	0.926427
#30	0.802364
#30	0.734455
#30	0.894537
#30	0.872755
#41	0.820529
#41	0.684337
#41	0.639501
#41	0.774579
#41	0.788126
#74	0.760539
#74	0.761092
#74	0.849457
#74	0.623305
#74	0.616872
#81	0.698533
#81	0.894287
#81	0.774958
#93	0.971255
#93	0.926598
#93	0.834042
#93	0.88241
#93	0.836885

## Sheet: Fig 6C
Control	DD
0.747347	0.680969
0.807281	0.872934
0.686237	0.810109
0.768435	0.782803
0.762325	0.909695
0.812222	0.905388
0.753313	0.765144
0.870424	0.845531
0.533947	0.769112
0.603028	0.690573
0.638243	0.582311
0.735294	0.463927
0.796766	0.633674
0.743991	0.49298
0.697154	0.832972
0.830578	0.940053
0.762375	1.01528
0.751413	0.823064
0.766508	0.832308
0.683173

## Sheet: Fig 6D
Control	DD
0.88789	0.747151
0.82679	0.80823
0.956968	0.948566
0.922151	0.906844
0.925069	0.789955
0.808545	0.730129
0.866199	0.792711
0.972017	0.849715
0.94154	0.926427
0.87923	0.802364
0.895858	0.734455
0.842284	0.894537
0.826706	0.872755
0.807566	0.820529
0.8598	0.684337
0.828147	0.639501
0.861392	0.774579
0.844457	0.788126
0.805973	0.760539
0.690974	0.761092
0.851078	0.849457
0.596386	0.623305
0.814647	0.616872
0.771462	0.698533
0.76726	0.894287
0.716208	0.774958
0.69726	0.971255
0.850109	0.926598
0.859392	0.834042
1.05065	0.88241
0.940517	0.836885
0.890062
0.923775
0.843103
0.774521
0.868023
0.82307
0.866104
