# Supplementary material for: Human induced pluripotent stem cell-derived cardiomyocytes to study inflammation-induced aberrant calcium transient
Source: eLife. 2024 Sep 27;13:RP95867. doi: 10.7554/eLife.95867 (PMC11434618; doi:10.7554/eLife.95867)
Supplement: Figure 6—source data 2. [file elife-95867-fig6-data2.xlsx]

## Sheet: Fig 6F
Control	Diaystol dysfunction
7	5
11	17
8	10
8	1
12	8
8	16
22	6
23	18

## Sheet: Fig 6G
Control	Diaystol dysfunction
59	57
56	78
45	51
58	43
61	51
57	89
74	48
130	83

## Sheet: Fig 6H
Control	Diaystol dysfunction
64	55
65	90
51	57
62	40
68	56
60	100
93	49
147	95

## Sheet: Fig 6I
Control	Diaystol dysfunction
9478	8659
9354	10461
8379	8961
10076	9357
9662	9664
10168	12921
10889	9086
14902	10675
